1    **Conversion of cancer-associated fibroblasts from pro- to**  
2    **antitumor improves the sensitivity of pancreatic cancer to**  
3    **chemotherapeutics**

4    Tadashi Iida<sup>1,2,11</sup>, Yasuyuki Mizutani<sup>1,2,11</sup>, Nobutoshi Esaki<sup>1</sup>, Suzanne M. Ponik<sup>3</sup>, Brian M  
5    Burkel<sup>3</sup>, Liang Weng<sup>4</sup>, Keiko Kuwata<sup>5</sup>, Atsushi Masamune<sup>6</sup>, Seiichiro Ishihara<sup>7</sup>, Hisashi  
6    Haga<sup>7</sup>, Kunio Kataoka<sup>1,2</sup>, Shinji Mii<sup>1</sup>, Yukihiro Shiraki<sup>1</sup>, Takuya Ishikawa<sup>2</sup>, Eizaburo  
7    Ohno<sup>2</sup>, Hiroki Kawashima<sup>8</sup>, Yoshiki Hirooka<sup>9</sup>, Mitsuhiro Fujishiro<sup>2</sup>, Masahide Takahashi<sup>10</sup>,  
8    Atsushi Enomoto<sup>1</sup>

9    <sup>1</sup>Department of Pathology, <sup>2</sup>Gastroenterology and Hepatology, Nagoya University Graduate  
10   School of Medicine, Nagoya 466-8550, Japan

11   <sup>3</sup>Department of Cell and Regenerative Biology, University of Wisconsin-Madison,  
12   Madison, WI, USA

13   <sup>4</sup>Center for Molecular Medicine, Xiangya Hospital, Central South University, Changsha,  
14   China

15   <sup>5</sup>Institute of Transformative Bio-Molecules, Nagoya University, Furo-cho, Chikusa-ku,  
16   Nagoya 464-8602, Japan

17   <sup>6</sup>Division of Gastroenterology, Tohoku University Graduate School of Medicine, Sendai,  
18   Japan

19   <sup>7</sup>Faculty of Advanced Life Science, Hokkaido University, Sapporo, Japan

20   <sup>8</sup>Department of Endoscopy, Nagoya University Hospital, Nagoya, Japan

1 <sup>9</sup>Department of Gastroenterology and Hepatology, Fujita Health University, Toyoake,  
2 Aichi, Japan.

3 <sup>10</sup>Division of International Center for Cell and Gene Therapy, Fujita Health University,  
4 Toyoake, Japan

5 <sup>11</sup>These authors contributed equally to this study.

6

7 **Corresponding author:** Atsushi Enomoto

8 Department of Pathology, Nagoya University Graduate School of Medicine, 65 Tsurumai-  
9 cho, Showa-ku, Nagoya 466-8550, Japan

10 Tel: +81-52-744-2093; Fax: +81-52-744-2098; Email: [enomoto@iar.nagoya-u.ac.jp](mailto:enomoto@iar.nagoya-u.ac.jp)

11

12 **Keywords:** Meflin, immunoglobulin superfamily containing leucine-rich repeat, cancer-  
13 associated fibroblasts, pancreatic cancer, tumor microenvironment, lysyl oxidase

14

15

16

17

18

1 **Abstract**

2 Previous therapeutic attempts to deplete cancer-associated fibroblasts (CAFs) or inhibit  
3 their proliferation in pancreatic ductal adenocarcinoma (PDAC) were not successful in  
4 mice or patients. Thus, CAFs may be tumor suppressive or heterogeneous, with distinct  
5 cancer-restraining and -promoting CAFs (rCAFs and pCAFs, respectively). Here, we show  
6 that induced expression of the glycosylphosphatidylinositol-anchored protein Meflin, a  
7 rCAF-specific marker, in CAFs by genetic and pharmacological approaches improved the  
8 chemosensitivity of mouse PDAC. A chemical library screen identified Am80, a synthetic,  
9 non-natural retinoid, as a reagent that effectively induced Meflin expression in CAFs.  
10 Am80 administration improved the sensitivity of PDAC to chemotherapeutics,  
11 accompanied by increases in tumor vessel area and intratumoral drug delivery.  
12 Mechanistically, Meflin was involved in the suppression of tissue stiffening by interacting  
13 with lysyl oxidase to inhibit its collagen crosslinking activity. These data suggested that  
14 modulation of CAF heterogeneity may represent a strategy for PDAC treatment.

15

16

17

18

19

20

21

## 1 **Introduction**

2 A well-known feature of pancreatic ductal adenocarcinoma (PDAC) is the proliferation of  
3 cancer-associated fibroblasts (CAFs), excessive deposition of the extracellular matrix  
4 (ECM) proteins produced by CAFs, and ECM remodelling in the stroma (1). CAF  
5 proliferation and ECM deposition are also found in many other recalcitrant cancers and  
6 constitute a major compartment of the tumor microenvironment (TME) along with tumor  
7 vessels and immune cells (2-7). CAFs promote cancer progression through various  
8 mechanisms and secrete various soluble factors, including growth factors, chemokines and  
9 cytokines, insoluble ECM, proteases, and extracellular vesicles, which may promote the  
10 proliferation, invasion, and metastasis of cancer cells and contribute to drug resistance and  
11 suppression of antitumor immunity (2-9). These findings have facilitated recent efforts to  
12 develop therapeutics that deplete CAFs or inhibit their proliferation and functions (2, 5-7,  
13 10-12).

14 CAFs were previously thought to be a uniform population of cells with cancer-  
15 promoting functions. However, several preclinical and clinical attempts to target CAFs in  
16 PDAC mouse models and patients were not therapeutically successful, and some  
17 intervention strategies resulted in disease progression (3, 10, 11). Thus, CAFs may suppress  
18 rather than support the progression of PDAC (2, 5-7). Recent studies showed that the  
19 antitumor activity of collagen type I produced by CAFs could shape the immune  
20 microenvironment and suppress PDAC progression (13, 14). In contrast, distinct subsets of  
21 CAFs with cancer-promoting and cancer-restraining functions may exist (2, 5-7). Indeed,  
22 recent single-cell transcriptomic analyses have shown that CAFs can be classified into  
23 many subsets (15, 16). Most relevant and characterized CAF subsets in PDAC are  
24 myofibroblastic CAFs (myCAFs), inflammatory CAFs (iCAFs), and antigen-presenting

1 CAFs (apCAFs) (16, 17). Clinicopathological and pharmacological studies have shown that  
2 these CAFs exert protumor effects through diverse mechanisms (15, 18, 19). However, the  
3 existence of cancer-restraining CAFs (rCAFs) and their marker proteins has not been  
4 investigated.

5 We recently identified the new CAF marker Meflin, a glycosylphosphatidylinositol  
6 (GPI)-anchored membrane protein encoded by the immunoglobulin superfamily containing  
7 leucine-rich repeat (*Islr*) gene, in both mouse and human PDAC (20, 21). Single-cell  
8 analyses of CAFs of mouse PDAC showed that Meflin marks a subset of CAFs distinct  
9 from  $\alpha$ -smooth muscle actin (SMA)<sup>+</sup> myCAFs and interleukin (IL)-6<sup>+</sup> iCAFs (15, 17, 20).  
10 Furthermore, our analyses of human PDAC samples, an autochthonous PDAC mouse  
11 model, tumor transplantation models, and cell biological assays showed that Meflin  
12 suppresses PDAC progression, suggesting that Meflin is a marker of rCAFs (3, 20).  
13 Interestingly, a lineage tracing experiment showed that Meflin<sup>+</sup> rCAFs, which appear in the  
14 very early stages of cancer, give rise to  $\alpha$ -SMA<sup>+</sup> CAFs that are negative or weakly-positive  
15 for Meflin during cancer progression, suggesting that Meflin<sup>+</sup> rCAFs differentiate into other  
16 CAF types, including myCAFs and iCAFs (3, 20). Moreover, induction of Meflin  
17 expression in Meflin<sup>-</sup> CAFs blocks PDAC progression in a tumor transplantation model,  
18 indicating that CAF function is determined by the net balance of the expression of cancer-  
19 promoting and -restraining proteins (20). In normal tissues, Meflin is expressed by  
20 pancreatic stellate cells (PSCs) in the pancreas and mesenchymal stem cells (MSCs) in the  
21 bone marrow (BM) and most other tissues, both of which are known to be major CAF  
22 origins (20-25). Therefore, rCAFs may be proliferating naïve (undifferentiated) PSCs or  
23 MSCs, which, as the tumor progresses, differentiate into Meflin-negative or weakly-  
24 positive cancer-promoting CAFs (pCAFs) (7, 20).

1           Given that Meflin is a functional marker of rCAFs in PDAC, one plausible strategy  
2 to treat PDAC may be to selectively induce Meflin expression in CAFs to change their  
3 phenotype. Accordingly, in this study, we first used a recombinant Sendai virus (SeV)  
4 vector to deliver the *Islr* gene, which encodes Meflin, to CAFs in a tumor transplantation  
5 mouse model. We then screened a chemical library and identified the synthetic unnatural  
6 retinoid Am80 as a compound that significantly induced Meflin expression in CAFs. Oral  
7 administration of Am80 to a PDAC transplantation mouse model significantly upregulated  
8 Meflin expression in CAFs and improved the sensitivity of tumors to conventional  
9 chemotherapeutics. We also provided mechanistic insights into the roles of Meflin in  
10 shaping the cancer-restraining TME. These findings suggest that the modulation or  
11 manipulation of CAF phenotypes by genetic or pharmacological intervention may represent  
12 a practical strategy for PDAC treatment.

13

14

15

16

17

18

19

20

## 1 **Materials and Methods**

### 2 **Human tissue samples**

3 All human PDAC samples were obtained at the time of endoscopic ultrasound-guided fine  
4 needle aspiration after the patients had provided informed consent. This study was  
5 approved by the Ethics Committee of Nagoya University Graduate School of Medicine  
6 (approval number 2017-0127-3).

7

### 8 **Animals**

9 All animal protocols were reviewed and approved by the Animal Care and Use Committee  
10 of Nagoya University Graduate School of Medicine (approval numbers 30366 and 20409),  
11 and studies were conducted in compliance with institutional and national guidelines. The  
12 establishment of KPC model and Meflin-KO mice was described previously (20, 21).  
13 Genomic DNA extracted from mouse tails was used for PCR-based genotyping of WT and  
14 Meflin-KO mice. The sequences of the primers used for genotyping of the Meflin (*Islr*)  
15 gene were as follows: PCR1 forward, 5'-GCTGCATTTGAGCTGAGCCTCTGG-3'; PCR1  
16 reverse, 5'-AACCCCTTCCTCCTACATAGTTGG-3'; PCR2 forward, 5'-  
17 TGAGGTTAGCCTGGGGACTTCAC-3'; PCR2 reverse, 5'-  
18 GGCTAGAACTCTCAAAGTAGGTCAGG-3'.

19

20 **Generation of recombinant virus, animal experiments, histology, cell biology,**  
21 **biochemistry, mass spectrometric analysis, and statistical analysis**

1 Detailed protocols for the generation of recombinant virus, animal experiments, histology,  
2 cell biology, biochemistry, mass spectrometric analysis, and statistical analysis are  
3 described in **Supplementary Data**.

4

5

6

7

8

9

10

11

12

13

14

15

16

17



## 1 **Results**

### 2 **Meflin expression in CAFs correlated with better responses to chemotherapeutics in** 3 **human PDAC**

4 Our previous study showed that the number of Meflin<sup>+</sup> CAFs correlates with favorable  
5 clinical outcomes in patients with stage II and III borderline resectable and locally  
6 advanced PDAC (20). Here, we examined the expression of Meflin in CAFs in biopsy  
7 samples obtained from patients with PDAC who underwent chemotherapy (gemcitabine  
8 [Gem] alone, GnP [Gem plus nab-paclitaxel (nabPTX)], or FOLFIRINOX) at our  
9 institution (**Table 1**) and evaluated correlations with objective response rates (ORRs; **Fig.**  
10 **1a, b**). As previously reported (20), *in situ* hybridization (ISH) analysis showed that Meflin  
11 expression was specifically observed in fibroblastic cells in the stroma, which represent  
12 CAFs, but not in other cell types such as epithelial (tumor), endothelial, smooth muscle,  
13 immune, and blood cells of PDAC tissues (**Fig. 1a**). Cases with 30% or more of stromal  
14 cells positive for Meflin were classified as Meflin high, whereas others were classified as  
15 Meflin low. Interestingly, some but not all CAFs expressed Meflin, and Meflin positivity in  
16 all CAFs was correlated with higher ORRs (**Fig. 1b**). Thus, Meflin<sup>+</sup> CAFs enhanced the  
17 chemosensitivity of PDAC.

18 This hypothesis was further supported by experiments in a tumor transplantation  
19 mouse model. We subcutaneously implanted mT5 cells, a mouse PDAC cell line (26), into  
20 wild-type (WT) and Meflin-knockout (KO) mice (21), followed by treatment with Gem  
21 (**Fig. 1c**). Notably, Gem treatment significantly reduced the volume of the implanted  
22 tumors in WT mice but not Meflin-KO mice, demonstrating the importance of Meflin  
23 expression in CAFs in tumor chemosensitivity (**Fig. 1d**). Consistent with our previous

1 report showing that Meflin-KO mice developed PDAC with decreased tumor vessel areas  
2 when crossed with the  $Kras^{LSL-G12D/+}$ ;  $Trp53^{LSL-R172H/+}$ ; Pdx-1-Cre (KPC) autochthonous  
3 PDAC model (27), mT5 tumors implanted into Meflin-KO mice exhibited decreases in the  
4 lumen of tumor vessels and CD31<sup>+</sup> endothelial area compared with WT mice (**Fig. 1e, f**).  
5 Thus, Meflin expression in CAFs was associated with chemosensitivity and tumor vessel  
6 perfusion, in contrast to the prevailing notion that most CAFs contribute to chemoresistance  
7 (28, 29).

8

### 9 **SeV-mediated Meflin expression improved PDAC sensitivity to Gem**

10 To induce Meflin expression in CAFs, we generated a SeV encoding mouse Meflin  
11 (**Supplementary Fig. 1a, b**). Infection of primary cultured mouse MSCs with SeV-Meflin  
12 ( $3 \times 10^7$  cell infectious units [CIU]) resulted in a significant increase in Meflin expression  
13 compared with a control SeV vector encoding DasherGFP (DGFP; **Fig. 2a**). This was  
14 accompanied by the downregulation of myCAF and iCAF markers, such as  $\alpha$ -SMA  
15 (*Acta2*), collagen type I and III (*Col1a1* and *Col3a1*), and IL6 (*Il6*; **Fig 2b**). The effects of  
16 SeV-mediated Meflin expression on CAF markers, except collagen types I and III, were  
17 also confirmed in the MSC cell line C3H10T1/2 (**Supplementary Fig. 1c**). Next, we found  
18 that injection of SeV-Meflin into subcutaneous mT5 tumors in WT mice induced Meflin  
19 overexpression without effects on  $\alpha$ -SMA expression (**Fig. 2c, d**). Contrary to our initial  
20 expectations, we did not observe any effects of repeated transduction of SeV-Meflin on  
21 tumor progression (**Fig. 2e, f**). However, mT5 tumors transduced with SeV-Meflin  
22 exhibited a significant increase in tumor vessel area (**Fig. 2g, h**) and sensitivity to Gem  
23 treatment (**Fig. 2i, j**). The proliferation rate of mT5 cells infected with SeV-Meflin was

1 comparable to that of control cells in culture (**Supplementary Fig. 1d**), suggesting that  
2 induction of Meflin expression in tumors enhanced their sensitivity to Gem through  
3 changes in the stromal compartment but not tumor cells.

4 Interestingly, we observed a rescue effect of SeV-mediated Meflin transduction on  
5 the progression of mT5 tumors developed in Meflin-KO mice (**Supplementary Fig. 2**).  
6 Induction of Meflin expression by SeV-Meflin significantly suppressed mT5 tumor growth  
7 in Meflin-KO mice, but not in WT mice (**Supplementary Fig. 2a, b**). ISH analysis showed  
8 that  $\alpha$ -SMA expression in the tumor stroma was downregulated by Meflin expression in  
9 tumors in Meflin-KO mice (**Supplementary Fig. 2c**). These data support that Meflin may  
10 suppress  $\alpha$ -SMA expression in CAFs and thereby block cancer progression.

11

## 12 **Identification of Am80 as an inducer of Meflin expression in CAFs**

13 The findings described above suggested that programming CAFs to overexpress Meflin or  
14 convert Meflin<sup>-low</sup> CAFs to Meflin<sup>+</sup> rCAF<sup>s</sup> may improve the chemosensitivity of PDAC.  
15 Moreover, administration of calcipotriol, a vitamin D analogue, to a PDAC model mice  
16 improves tumor sensitivity to Gem (30), and all-trans-retinoic acid (ATRA) reprograms  
17 activated PSCs to inhibit tumor progression through suppression of ECM remodeling (31).  
18 These studies have been the basis of ongoing clinical trials evaluating the efficacy of  
19 combination therapies of vitamin D analogues, ATRA, and conventional chemotherapeutics  
20 in patients with advanced PDAC (ref. 32; <https://clinicaltrials.gov/>). We previously showed  
21 that calcipotriol treatment upregulated Meflin in PDAC CAFs (20), suggesting that Meflin  
22 expression may mediate the effects of calcipotriol and ATRA on improving outcomes in  
23 patients with PDAC. Accordingly, in this study, we screened a library of nuclear receptor

1 ligands to identify compounds that effectively upregulate Meflin expression in CAFs using  
2 human PSCs isolated from pancreatic tissues adjacent to PDAC and cultured long-term on  
3 plastic, which exhibit essentially the same properties as CAFs (30), and mouse MSCs,  
4 which are a known CAF origin in mice (**Supplementary Fig. 3a, b**). Among the  
5 compounds that upregulated Meflin in both cell types, we identified Am580, a synthetic  
6 retinoid and retinoic acid receptor (RAR)  $\alpha$ -selective agonist (33, 34).

7 We next validated the effects of Am580 and another synthetic retinoid Am80, which  
8 is a retinobenzoic acid that is structurally related to Am580 (33, 34), on the expression of  
9 Meflin and other CAF marker genes in mouse MSCs (**Fig. 3a**). Am580, Am80, and ATRA  
10 upregulated Meflin and downregulated  $\alpha$ -SMA and collagen type I and III, suggesting  
11 potential application in conversion of the CAF phenotype. Because that Am80 is approved  
12 for treating patients with recurrent and intractable acute promyelocytic leukemia (APL) in  
13 Japan (trade name: Tamibarotene) (35), we explored the *in vivo* effects of Am80 in PDAC  
14 progression in the further experiments.

15 Oral administration of varying doses of Am80 to WT mice harboring subcutaneous  
16 mT5 tumors affected neither body weight nor tumor volume and weight (**Fig. 3b–e**). Am80  
17 also did not affect the proliferation of cultured mT5 PDAC cells at concentrations of 0.01–1  
18  $\mu$ M in culture, indicating that Am80 did not have direct cytotoxic effects in mT5 PDAC  
19 cells (**Supplementary Fig. 4**). ISH analysis of mT5 tumor tissues showed that Meflin  
20 expression in stromal cells was highly upregulated by Am80 administration, accompanied  
21 by downregulation of  $\alpha$ -SMA (**Fig. 3f**). As expected from analyses of human PDAC biopsy  
22 samples and mT5 tumors transduced with SeV-Meflin (**Figs. 1, 2**), Am80 administration  
23 increased tumor vessel area in the mT5 tumor transplantation model (**Fig. 3g**).

1

## 2 **Am80 administration enhanced the effects of chemotherapeutics**

3 We next orally administered Am80 to WT mice harboring mT5 tumors for 1 week,  
4 followed by treatment with Am80 plus Gem (**Fig. 4a**). The combined treatment did not  
5 affect the body weight of mice (**Fig. 4b**). Interestingly, Am80 administration enhanced the  
6 antitumor effects of Gem, as demonstrated by monitoring of tumor volume and weight  
7 (**Fig. 4c, d**). Histological analysis using hematoxylin & eosin (H&E) staining showed that  
8 tumors treated with the combination therapy contained a greater number of necrotic cells  
9 with pyknotic nuclei (**Fig. 4e**) and exhibited higher Meflin and lower  $\alpha$ -SMA expression  
10 than tumors treated with Gem alone (**Fig. 4f–g**). Consistent with the effects of Am80  
11 administration on tumor vessel area (**Fig. 3g**), the concentration of Gem (2',2'-  
12 difluorodeoxycytidine [dFdC]) was higher in tumors treated with the combination therapy  
13 than in those treated with Gem monotherapy, suggesting that Am80 enhances the  
14 intratumoral delivery of Gem (**Fig. 4h**).

15 The effects of oral Am80 administration were further tested using the KPC PDAC  
16 mouse model ( $Kras^{LSL-G12D/+}$ ;  $Trp53^{LSL-R172H/+}$ ; Pdx-1-Cre), which recapitulates human  
17 PDAC with extensive stromal fibroinflammatory reaction (27) and a human PDAC  
18 xenograft model (**Supplementary Fig. 5**). Echographic measurement of tumor sizes in  
19 KPC mice revealed that Am80 administration significantly improved the antitumor effects  
20 of Gem (**Supplementary Fig. 5a–c**). We next transplanted BxPC3 human PDAC cells into  
21 immunocompromised nude mice, followed by oral administration of Am80 and the  
22 combination chemotherapy of Gem and nabPTX (**Supplementary Fig. 5d**). Am80  
23 administration did not alter the body weight of the mice but significantly improved the

1 antitumor effects of Gem plus nabPTX (**Supplementary Fig. 5e, f**). This observation  
2 suggested minor involvement of the immune machinery in the mechanism of action.

3

#### 4 **Am80-mediated enhancement of chemosensitivity required Meflin expression in CAFs**

5 Next, to further confirm the significance of Am80-mediated Meflin expression in enhanced  
6 chemosensitivity, we transplanted mT5 PDAC cells into Meflin-KO mice, followed by  
7 Am80 administration and Gem treatment (**Fig. 5a**). Gem treatment, with or without Am80  
8 administration, did not alter the body weight of the transplanted Meflin-KO mice (**Fig. 5b**).  
9 Am80 administration in combination with Gem resulted in a slight but not statistically  
10 significant decrease in tumor volume and weight compared with Gem monotherapy (**Fig.**  
11 **5c, d**). The numbers of necrotic cells with pyknotic nuclei and the expression levels of  $\alpha$ -  
12 SMA in the stroma were comparable between the monotherapy and combination therapy  
13 groups (**Fig. 5e–g**). Because Meflin is specifically expressed in CAFs but not other cell  
14 types in PDAC tissue (20), these data suggested that Am80 exerted its effects on  
15 chemotherapeutic efficacy by upregulation of Meflin in CAFs. Indeed, when we  
16 transplanted BxPC3 PDAC cells with or without immortalized human PSCs into nude  
17 mice, followed by combination therapy with Am80 and Gem (**Fig. 5h**), we found that  
18 effects of Am80 administration on tumor sensitivity to Gem were observed only when  
19 BxPC3 cells were cotransplanted with PSCs (**Fig. 5i, j**). Thus, enhancement of tumor  
20 chemosensitivity by Am80 was mediated by its effects on CAFs but not cancer cells.

21

#### 22 **Meflin interacted with lysyl oxidase (Lox) to suppress its collagen crosslinking activity**

1 Meflin augments bone morphogenetic protein (BMP) 7 signaling to oppose the profibrotic  
2 action of transforming growth factor (TGF)- $\beta$  (36, 37-); however, this mechanism does not  
3 fully explain the changes found in tumors administered Am80 and the differences between  
4 WT and Meflin-KO tumors. In our previous reports, second-harmonic generation (SHG)  
5 microscopic observations revealed that the stroma of tumors in Meflin-KO KPC mice  
6 exhibited significant remodeling of collagen architectures compared with those in WT KPC  
7 mice (20). These data suggested that Meflin was involved in the regulation of collagen  
8 configuration in the tumor stroma, which may subsequently change the mechanical  
9 properties of the tumor stroma, such as interstitial pressure (38).

10 To identify the mechanisms through which Meflin is involved in regulation of stromal  
11 collagen, we attempted to identify novel ligands of Meflin. To this end, we transduced  
12 mouse MSCs with Meflin cDNA tagged with the hemagglutinin (HA) epitope, followed by  
13 immunoprecipitation (IP) with anti-HA antibodies and analysis of the eluate by mass  
14 spectrometry (**Supplementary Fig. 6a, b**). We identified seven secreted or membrane  
15 proteins as candidate Meflin interactors and focused on the protein with the highest score,  
16 Lox (**Supplementary Fig. 6c**). Lox is known to crosslink collagen and elastin, the two  
17 major components of the ECM, contributing to the stiffness and interstitial pressure of the  
18 tumor stroma (39, 40). IP assays confirmed that Meflin interacted with Lox (**Fig. 6a**) and  
19 lysyl oxidase like 2 (Loxl2), another member of the Lox gene family (**Supplementary Fig.**  
20 **6d**). Direct interaction of Meflin and Lox was demonstrated in *in vitro* binding assays using  
21 purified recombinant Meflin and Lox proteins (**Supplementary Fig. 6e**). Additional IP  
22 assays revealed the interaction of endogenous Meflin with Lox and Loxl2 proteins,  
23 highlighting the physiological relevance of these protein interactions (**Fig. 6b,**  
24 **Supplementary Fig. 6f**). A mutant Lox lacking the amino-terminal pro-sequence also

1 interacted with Meflin, suggesting that the catalytic domain (CD) of Lox was responsible  
2 for this interaction (**Fig. 6c, d**). Pull-down assays using Meflin mutants fused with the  
3 constant region (Fc) of human immunoglobulin lacking one of the leucine-rich repeats  
4 (LRRs) and the immunoglobulin (Ig)-like domain showed that a region spanning the  
5 LRR1–4 domains of Meflin was likely to be responsible for Lox binding (**Supplementary**  
6 **Fig. 7a, b**). Functionally, biochemical assays showed that Meflin had inhibitory effects on  
7 the oxidative deamination activity of Lox12, suggesting that Meflin had inhibitory roles in  
8 collagen crosslinking mediated by Lox or Lox12 (**Fig. 6e**).

9 We next analyzed the effects of Am80 administration on the collagen signature of  
10 mT5 xenograft tumors in the presence or absence of Gem by SHG microscopy (**Fig. 6f, g**).  
11 The data showed highly aligned collagen fibers in control mT5 tumors, which were  
12 significantly reversed by Am80 administration, in the absence of Gem treatment. This  
13 difference disappeared upon Gem treatment. Other collagen signatures, such as curvature,  
14 width, and fiber length, were all comparable between the tested groups (**Supplementary**  
15 **Fig. 8a–c**). Interestingly, measurement of the Young's modulus of the tumors showed that  
16 Am80-treated tumors were softer than control tumors (**Fig. 6h, i**). Because collagen fiber  
17 alignment modulates tumor stiffness (38), these data suggested that Am80-mediated Meflin  
18 upregulation inhibited Lox-mediated collagen crosslinking, thereby controlling the physical  
19 properties of tumors (**Fig. 6j**).

20

21 **Differential effects of Am80 and vitamin D administration on CAF gene expression**  
22 **and tumor progression**



1 Administration of the vitamin D analogue calcipotriol alters the gene expression of stromal  
2 cells of PDAC in mice (30). Therefore, we next investigated how Am80 differed from  
3 vitamin D analogues in terms of effects on gene expression in PDAC CAFs. Thus, we  
4 stimulated primary cultured PSCs isolated from three patients with PDAC (PSC163,  
5 PSC52, and PSC119) with dimethyl sulfoxide (DMSO, control), Am80, or calcipotriol.  
6 Gene expression profiles were then compared using microarray-based transcriptomic  
7 analysis (**Supplementary Fig. 9a, b**). Extracting genes that were differentially expressed  
8 between Am80- and calcipotriol-treated cells revealed that Meflin expression was more  
9 significantly upregulated by Am80 than calcipotriol. Interestingly, the expression levels of  
10 fibroblast activation protein (FAP) and chemokine (C-C motif) ligand 2 (CCL2), which are  
11 markers of pCAFs (2, 6, 7, 41, 42-), were higher in Am80-treated PSCs than calcipotriol-  
12 treated PSCs, whereas the expression levels of other pCAF marker genes, such as C-X-C  
13 motif chemokine ligand 12 (CXCL12), podoplanin (PDPN) and periostin (POSTN), were  
14 higher in calcipotriol-treated cells. These data suggested that Am80 and calcipotriol  
15 differentially regulated gene expression in PSCs.

16 We finally treated mT5 xenograft tumors with Gem in combination with Am80 or  
17 calcipotriol administered orally or intraperitoneally (i.p.), respectively (**Supplementary**  
18 **Fig. 9c**). Both treatments did not result in decreased body weight (**Supplementary Fig.**  
19 **9d**). Interestingly, administration of Am80 but not calcipotriol significantly improved Gem  
20 efficacy in the xenograft model (**Supplementary Fig. 9e**). These results, although not  
21 conclusive and possibly confounded by different doses and timings of Am80 and  
22 calcipotriol administration, suggested that Am80 and calcipotriol had distinct effects on  
23 gene expression in CAFs, which may affect the efficacy of chemotherapeutics.

24

## 1 Discussion

2 In the current study, we found that the number of Meflin<sup>+</sup> CAFs, a candidate for rCAF in  
3 PDAC, correlated with the response of patients with PDAC to chemotherapies. We also  
4 demonstrated the tumor-suppressive role of Meflin in PDAC mouse models by inducing its  
5 expression through genetic and pharmacological approaches. These experiments led to the  
6 identification of Am80 as an inducer of Meflin expression in CAFs and showed that Am80  
7 improved the sensitivity of PDAC to chemotherapeutics. Finally, we showed that Meflin  
8 functioned to suppress Lox collagen crosslinking activity, which may increase tumor vessel  
9 area and chemotherapeutic sensitivity, as observed in tumors with high Meflin expression  
10 (**Fig. 6j**). Taken together, these data support that there are functionally heterogeneous but  
11 phenotypically plastic subsets of CAFs in the tumor stroma, consistent with the observation  
12 that tumor immunity is regulated by the net balance of anti- and protumor immune cells  
13 (43, 44). Given that Meflin<sup>+</sup> CAFs weakly or moderately express  $\alpha$ -SMA (7, 20), we  
14 speculate that the failure to deplete all  $\alpha$ -SMA<sup>+</sup> CAFs in a preclinical PDAC model was  
15 caused by the depletion of Meflin<sup>+</sup> CAFs (10).

16 The findings in the current study should be discussed in the context of a previous  
17 study, in which researchers demonstrated that calcipotriol administration suppresses  
18 stromal activation and improves the efficacy of Gem treatment in a PDAC mouse model  
19 (30). Calcipotriol targets activated PSCs expressing vitamin D receptor (VDR), which  
20 likely represent pCAF, to revert or deactivate them to a more quiescent, less cancer-  
21 supportive state (20, 30). This VDR and ligand-mediated reversion of activated PSCs to  
22 quiescent PSCs has been called stromal reprogramming, which is the basis of ongoing  
23 clinical trials that test the efficacy of vitamin D analogs in combination with  
24 chemotherapeutics or immune checkpoint inhibitors in patients with PDAC

1 (www.clinicaltrials.gov). We previously reported that Meflin is a marker of quiescent PSCs  
2 in the normal pancreas, and its expression was upregulated by calcipotriol (20). This was  
3 consistent with the results of a present study showing that Meflin expression in CAFs  
4 correlates with sensitivity to chemotherapeutics in PDAC. Therefore, Meflin may be a  
5 surrogate or monitoring marker of the stromal reprogramming of PDAC in clinical trials.

6 Interestingly, our experiments showed that Am80 was a more potent inducer of high  
7 chemosensitivity than calcipotriol in a xenograft tumor model. However, these findings  
8 may be limited to the experimental models used in the current study, and further studies on  
9 more human-relevant models and clinical trials are warranted. Am80 is a synthetic  
10 unnatural retinoid that specifically binds to RAR $\alpha$  and  $\beta$ , with  $K_i$  values of  $6.5 \times 10^{-9}$  and  
11  $3.0 \times 10^{-10}$  M, respectively, but not RAR  $\gamma$ ; these findings are contradictory to ATRA,  
12 which has similar affinities to all RAR isoforms (45). In addition, Am80 shows several  
13 pharmacological advantages over ATRA. For example, Am80 exhibits significantly higher  
14 stability to light, heat, and oxidation than ATRA, which allows a lower dose ( $6 \text{ mg/m}^2$ ) to  
15 exert its effect than ATRA ( $45 \text{ mg/m}^2$ ) in clinical practice (35). Am80 binds to cellular RA-  
16 binding protein, the induced upregulation of which is known to mediate resistance to  
17 ATRA in APL, with a 20-fold lower affinity than ATRA (35, 45). Oral intake of Am80  
18 does not produce serious metabolic complications, such as hypercalcemia caused by high-  
19 dose vitamin D administration (46). Furthermore, similar to ATRA, Am80 has been shown  
20 to have various biological activities, including induction of cell differentiation and  
21 modulation of immunity (33, 47). Therefore, the hypothesis that Am80 suppresses tumor  
22 progression by increasing the number of Meflin<sup>+</sup> rCAFs may be a simplistic interpretation  
23 of the experimental results obtained in the current study, and more extensive studies are  
24 needed to comprehensively elucidate the effects of Am80 on tumor cells and TME

1 components. Additionally, it will be necessary to evaluate the effects of Am80 oral  
2 administration on drug sensitivity in patients with PDAC in the clinical settings.

3 Our data showed a significant increase in blood vessel areas in tumors treated with  
4 SeV-Meflin and Am80, supporting the involvement of these interventions in modulation of  
5 tumor angiogenesis. However, previous studies showed an inhibitory effect of Am80 on  
6 angiogenesis (48) and no Meflin expression in vascular endothelial and smooth muscle  
7 cells (21); thus, it is plausible that SeV-Meflin- and Am80-mediated changes in the tumor  
8 vessel lumen may be attributed to alterations in the mechanical properties of the tumor  
9 stroma. Consistent with this hypothesis, our search for Meflin ligands revealed that Meflin  
10 interacts with Lox to inhibit its collagen crosslinking activity. Lox is a critical regulator of  
11 the physical properties of the tumor stroma, such as stiffness and interstitial pressure (38).  
12 Therefore, artificial induction of Meflin expression in CAFs may be a rational approach to  
13 improve the perfusion of tumor vessels and drug delivery. The involvement of other  
14 reported functions of Meflin, including the regulation of BMP7, Wnt, and Hippo-Yes-  
15 associated protein (Yap) signaling pathways, in the regulation of tumor vessel area also  
16 needs to be considered (49, 50).

17 In conclusion, our current findings showed that Meflin expression in CAFs improved  
18 tumor sensitivity to chemotherapeutics, consistent with our previous studies identifying  
19 Meflin as a marker of rCAFs, which are functionally different from protumorigenic pCAFs  
20 (7, 22, 43). Consistent with this, the induction of Meflin expression by either genetic or  
21 pharmacological approaches improved tumor sensitivity to chemotherapeutics in a PDAC  
22 xenograft model. Taken together, these data provide a rationale for therapeutic strategies  
23 that increase the number of rCAFs in the treatment of patients with PDAC.

## 1 **Acknowledgments**

2 We thank David Tuveson (Cold Spring Harbor Laboratory) and Chang-il Hwang (UC  
3 Davis College of Biological Sciences) for providing the mouse PDAC cell line mT5; Kohji  
4 Kusano (ID Pharma Co., Ltd.) for generating recombinant Sendai virus; Shuzo Watanabe,  
5 Kaoru Shimada (RaQualia Pharma Inc.), and Hisao Ekimoto (TMRC Co., Ltd.) for helpful  
6 discussions on Am80; Kentaro Taki (Nagoya University) for help with mass spectrometry;  
7 and Kozo Uchiyama and Kaori Ushida (Nagoya University) for technical assistance. This  
8 work was supported by a Grant-in-Aid for Scientific Research (B) (grant nos. 18H02638 to  
9 A.E. and 20H03467 to M.T.) commissioned by the Ministry of Education, Culture, Sports,  
10 Science and Technology of Japan; Nagoya University Hospital Funding for Clinical  
11 Research (to A.E.); AMED-CREST (Japan Agency for Medical Research and  
12 Development, Core Research for Evolutional Science and Technology; grant nos.  
13 20gm0810007h0105 and 20gm1210009s0102 to A.E.); and the Project for Cancer Research  
14 and Therapeutic Evolution (P-CREATE) from AMED (grant nos. 20cm0106377h0001 to  
15 A.E. and 21cm0106704h0002 to Y.M.).

16

17

## 18 **Author contributions**

19 T.Ii. designed and performed the experiments, analyzed the data, and wrote the manuscript.  
20 Y.M. and N.E. designed and performed the experiments and analyzed the data. S.M.P. and  
21 B.M.B. performed SHG analysis. L.W. performed a mass spectrometric analysis. K.Ku.  
22 performed the measurement of intratumoral concentrations of dFdC. K.Ka., A.M., T.Is.,

1 E.O., and H.K. provided the clinical samples and intellectual input. S.I. and H.H. assisted  
2 with the analysis of tumor stiffness. S.M. and Y.S. assisted with histological analysis. H.K.,  
3 Y.H., M.F., and M.T. directed the project and provided intellectual input. A.E. directed the  
4 project and wrote the manuscript.

5

6

## 7 **Competing interests statement**

8 The authors declare no competing interests.

9

10

## 11 **References**

- 12 1. Apte, M.V. et al. Desmoplastic reaction in pancreatic cancer: role of pancreatic stellate  
13 cells. *Pancreas*. **29**, 179-187 (2004).
- 14 2. Sahai, E. et al. A framework for advancing our understanding of cancer-associated  
15 fibroblasts. *Nat Rev Cancer*. **20**, 174-186 (2020).
- 16 3. Neesse, A. et al. Stromal biology and therapy in pancreatic cancer: ready for clinical  
17 translation? *Gut*. **68**, 159-171 (2019).
- 18 4. Öhlund, D. Elyada, E. & Tuveson, D. Fibroblast heterogeneity in the cancer wound. *J*  
19 *Exp Med*. **211**, 1503-1523 (2014).

- 1 5. Gieniec, K.A., Butler, L.M. Worthley, D.L. & Woods, S.L. Cancer-associated  
2 fibroblasts—heroes or villains? *Br J Cancer*. **121**, 293-302 (2019).
- 3 6. Kobayashi, H. et al. Cancer-associated fibroblasts in gastrointestinal cancer. *Nat Rev*  
4 *Gastroenterol Hepatol*. **16**, 282-295 (2019).
- 5 7. Miyai, Y., Esaki, N., Takahashi, M., & Enomoto, A. Cancer-associated fibroblasts that  
6 restrain cancer progression: Hypotheses and perspectives. *Cancer Sci*. **111**, 1047-1057  
7 (2020).
- 8 8. Ishii, G. Ochiai, A. & Neri, S. Phenotypic and functional heterogeneity of cancer-  
9 associated fibroblast within the tumor microenvironment. *Adv Drug Deliv Rev*. **99**,  
10 186-196 (2016).
- 11 9. Mezawa, Y. & Orimo, A. The roles of tumor-and metastasis-promoting carcinoma-  
12 associated fibroblasts in human carcinomas. *Cell Tissue Res*. **365**, 675-689 (2016).
- 13 10. Özdemir, B.C. et al. Depletion of carcinoma-associated fibroblasts and fibrosis induces  
14 immunosuppression and accelerates pancreas cancer with reduced survival. *Cancer*  
15 *Cell*. **25**, 719-734 (2014).
- 16 11. Rhim, A.D. et al. Stromal elements act to restrain, rather than support, pancreatic  
17 ductal adenocarcinoma. *Cancer Cell*. **25**, 735-747 (2014).
- 18 12. Lee, J.J. et al. Stromal response to Hedgehog signaling restrains pancreatic cancer  
19 progression. *Proc Natl Acad Sci USA*. **111**, E3091-E3100 (2014).

- 1 13. Bhattacharjee, S. et al. Tumor restriction by type I collagen opposes tumor-promoting  
2 effects of cancer-associated fibroblasts. *J Clin Invest.* doi: 10.1172/JCI146987.  
3 Online ahead of print.
- 4 14. Chen, Y. et al. Type I collagen deletion in  $\alpha$ SMA<sup>+</sup> myofibroblasts augments immune  
5 suppression and accelerates progression of pancreatic cancer. *Cancer Cell.* **39**, 548-565  
6 (2021).
- 7 15. Biffi, G. et al. IL1-induced JAK/STAT signaling is antagonized by TGF $\beta$  to shape  
8 CAF heterogeneity in pancreatic ductal adenocarcinoma. *Cancer Discov.* **9**, 282-301  
9 (2019).
- 10 16. Elyada, E. et al. Cross-species single-cell analysis of pancreatic ductal adenocarcinoma  
11 reveals antigen-presenting cancer-associated fibroblasts. *Cancer Discov.* **9**, 1102-1123  
12 (2019).
- 13 17. Öhlund, D. et al. Distinct populations of inflammatory fibroblasts and myofibroblasts  
14 in pancreatic cancer. *J Exp Med.* **214**, 579-596 (2017).
- 15 18. Shi, Y. et al. Targeting LIF-mediated paracrine interaction for pancreatic cancer  
16 therapy and monitoring. *Nature.* **569**, 131-135 (2019).
- 17 19. Nagathihalli, N.S. et al. Pancreatic stellate cell secreted IL-6 stimulates STAT3  
18 dependent invasiveness of pancreatic intraepithelial neoplasia and cancer cells.  
19 *Oncotarget.* **7**, 65982-65992 (2016).
- 20 20. Mizutani, Y. et al. Meflin-positive cancer-associated fibroblasts inhibit pancreatic  
21 carcinogenesis. *Cancer Res.* **79**, 5367-5381 (2019).



- 1 21. Maeda, K. et al. Identification of Meflin as a potential marker for mesenchymal  
2 stromal cells. *Sci Rep.* **6**, 22288 (2016).
- 3 22. Hara, A. et al. Meflin defines mesenchymal stem cells and/or their early progenitors  
4 with multilineage differentiation capacity. *Genes Cells.* doi: 10.1111/gtc.12855. Online  
5 ahead of print.
- 6 23. Neuzillet, C. et al. Inter- and intra-tumoural heterogeneity in cancer-associated  
7 fibroblasts of human pancreatic ductal adenocarcinoma. *J Pathol.* **248**, 51-65 (2019).
- 8 24. Waghray, M. et al. GM-CSF mediates mesenchymal–epithelial cross-talk in pancreatic  
9 cancer. *Cancer Discov.* **6**, 886-899 (2016).
- 10 25. Quante, M. et al. Bone marrow-derived myofibroblasts contribute to the mesenchymal  
11 stem cell niche and promote tumor growth. *Cancer Cell.* **19**, 257-272 (2011).
- 12 26. Boj, S.F. et al. Organoid models of human and mouse ductal pancreatic cancer. *Cell.*  
13 **160**, 324-338 (2015).
- 14 27. Hingorani, S.R. et al. Trp53R172H and KrasG12D cooperate to promote chromosomal  
15 instability and widely metastatic pancreatic ductal adenocarcinoma in mice. *Cancer*  
16 *Cell.* **7**, 469-483 (2005).
- 17 28. Zhang, D. et al. Tumor-stroma IL1 $\beta$ -IRAK4 feedforward circuitry drives tumor  
18 fibrosis, chemoresistance, and poor prognosis in pancreatic cancer. *Cancer Res.* **78**,  
19 1700-1712 (2018).
- 20 29. Olive, K.P. et al. Inhibition of Hedgehog signaling enhances delivery of chemotherapy  
21 in a mouse model of pancreatic cancer. *Science.* **324**, 1457-1461 (2009).

- 1 30. Sherman, M.H. et al. Vitamin D receptor-mediated stromal reprogramming suppresses  
2 pancreatitis and enhances pancreatic cancer therapy. *Cell*. **159**, 80-93 (2014).
- 3 31. Chronopoulos, A. et al. ATRA mechanically reprograms pancreatic stellate cells to  
4 suppress matrix remodelling and inhibit cancer cell invasion. *Nat Commun*. **7**, 12630  
5 (2016).
- 6 32. Kocher, H.M. et al. Phase I clinical trial repurposing all-trans retinoic acid as a stromal  
7 targeting agent for pancreatic cancer. *Nat Commun*. **11**, 4841 (2020).
- 8 33. Kagechika, H. et al. New type inducers of differentiation of human HL-60  
9 promyelocytic leukemia cells. Terephthalic anilides. *Chem Pharm Bull*. **32**, 4209-4212  
10 (1984).
- 11 34. Kagechika, H. Novel synthetic retinoids and separation of the pleiotropic retinoidal  
12 activities. *Curr Med Chem*. **9**, 591-608 (2002).
- 13 35. Tobita, T. et al. Treatment with a new synthetic retinoid, Am80, of acute  
14 promyelocytic leukemia relapsed from complete remission induced by all-trans retinoic  
15 acid. *Blood*. **90**, 967-973 (1997).
- 16 36. Hara, A, et al. Roles of the mesenchymal stromal/stem cell marker Mefflin in cardiac  
17 tissue repair and the development of diastolic dysfunction. *Circ Res*. **125**, 414-430  
18 (2019).
- 19 37. Kobayashi, H. et al. The balance of stromal BMP signaling mediated by GREM1 and  
20 ISLR drives colorectal carcinogenesis. *Gastroenterology*. **160**, 1224-1239 (2021)

- 1 38. Levental, K.R. et al. Matrix crosslinking forces tumor progression by enhancing  
2 integrin signaling. *Cell*. **139**, 891–906 (2009).
- 3 39. Barker, H.E. Cox, T.R. & Ertler, J. The rationale for targeting the LOX family in  
4 cancer. *Nat Rev Cancer*. **12**, 540–552 (2012).
- 5 40. Benfamin, L.C. et al. Lysyl oxidase family activity promotes resistance of pancreatic  
6 ductal adenocarcinoma to chemotherapy by limiting the intratumoral anticancer drug  
7 distribution. *Oncotarget*. **7**, 32100–32112 (2016).
- 8 41. Yang, X. et al. FAP promotes immunosuppression by cancer-associated fibroblasts in  
9 the tumor microenvironment via STAT3–CCL2 signaling. *Cancer Res*. **76**. 4124–4135  
10 (2016).
- 11 42. Puré, E. & Blomberg, R. Pro-tumorigenic roles of fibroblast activation protein in  
12 cancer: back to the basics. *Oncogene*. **37**, 4343–4357 (2018).
- 13 43. Chen, D.S. & Mellman I. Oncology meets immunology: the cancer-immunity cycle.  
14 *Immunity*. **39**, 1–10 (2013).
- 15 44. Gonzalez, H., Hagerling, C. & Werb, Z. Roles of the immune system in cancer: from  
16 tumor initiation to metastatic progression. *Genes Dev*. **32**, 1267–1284 (2018).
- 17 45. Hashimoto, Y., Kagechika, H. & Shudo, K. Expression of retinoic acid receptor genes  
18 and the ligand-binding selectivity of retinoic acid receptors (RAR's). *Biochem Biophys*  
19 *Res Commun*. **166**, 1300–1307 (1990).
- 20 46. Tebben, P.J., Singh, R.J. & Kumar, R. Vitamin D-Mediated Hypercalcemia:  
21 Mechanisms, Diagnosis, and Treatment. *Endocr Rev*. **37**, 521–547 (2016).

- 1 47. Klemann, C. et al. Synthetic retinoid AM80 inhibits Th17 cells and ameliorates  
2 experimental autoimmune encephalomyelitis. *Am J Pathol.* **174**, 2234-45 (2009).
- 3 48. Takaomi, S. et al. Antimyeloma effects of a novel synthetic retinoid Am80  
4 (Tamibarotene) through inhibition of angiogenesis. *Leukemia.* **19**, 901-909 (2005).
- 5 49. Zhang, K. et al. Islr regulates canonical Wnt signaling-mediated skeletal muscle  
6 regeneration by stabilizing Dishevelled-2 and preventing autophagy. *Nat Commun.* **9**,  
7 129 (2018).
- 8 50. Xu, J. et al. Secreted stromal protein ISLR promotes intestinal regeneration by  
9 suppressing epithelial Hippo signaling. *EMBO J.* **39**, e103255 (2020).

10

11

12

13

14

15

16

17

18

**Table 1.** Characteristics of patients with PDAC included in the current study

| Characteristics       |                      | Total | Meflin high | Meflin low | $\chi^2$ test<br><i>P</i> value |
|-----------------------|----------------------|-------|-------------|------------|---------------------------------|
| Number                |                      | 33    | 10          | 23         |                                 |
| Median age<br>(years) |                      | 68    | 65          | 68         |                                 |
| Sex                   | Male                 | 23    | 8           | 15         | 0.3958                          |
|                       | Female               | 10    | 2           | 8          |                                 |
| TNM stage             | T3N0M1               | 7     | 1           | 6          |                                 |
|                       | T3N1M1               | 5     | 2           | 3          |                                 |
|                       | T4N0M0               | 6     | 3           | 3          |                                 |
|                       | T4N1M0               | 3     | 1           | 2          |                                 |
|                       | T4N0M1               | 10    | 2           | 8          |                                 |
|                       | T4N1M1               | 2     | 1           | 1          |                                 |
| Clinical stage        | III                  | 10    | 4           | 6          | 0.4241                          |
|                       | IV                   | 23    | 6           | 17         |                                 |
| Chemotherapy          | FOLFILINOX           | 7     | 3           | 4          | 0.4217                          |
|                       | GnP and Gem<br>(Gem) | 26    | 7 (2)       | 19 (2)     |                                 |

1 **Figure legends**

2 **Figure 1.** Numbers of Meflin<sup>+</sup> stromal cells correlated with response of patients with  
3 PDAC to chemotherapeutics and tumor vessel area.

4 **(a)** Representative images of Meflin ISH analysis on formalin-fixed and paraffin-embedded  
5 (FFPE) sections of biopsy samples obtained from patients with PDAC by endoscopic  
6 ultrasound-guided fine needle aspiration (EUS-FNA). Cases with 30% or more of stromal  
7 cells positive for Meflin were classified as Meflin high (cases 1 and 2, upper panel),  
8 whereas others were classified as Meflin low (cases 3 and 4, lower panel). Boxed areas  
9 were magnified in adjacent panels. Red arrows indicate Meflin<sup>+</sup> CAFs. Black arrows  
10 indicate CAFs weakly positive for Meflin. T, tumor cells.

11 **(b)** Waterfall plots depicting tumor responses of patients with PDAC (N = 33), who  
12 received Gem, nabPTX plus Gem (GnP), or FOLFIRINOX, evaluated by the Response  
13 Evaluation Criteria in Solid Tumors (RECIST) criteria. The table in the right panel shows  
14 the numbers of patients classified by their response status and Meflin expression. The  
15 results of statistical analysis are also shown.

16 **(c)** WT and Meflin-KO female mice at postnatal day (P) 42 were subcutaneously  
17 transplanted with mT5 mouse PDAC cells ( $1 \times 10^6$  cells/mouse), followed by i.p.  
18 administration of Gem or saline three times every 2 days and sacrifice at day 25.

19 **(d)** Quantification of the volumes of tumors developed in WT and Meflin-KO mice  
20 administered saline (blue) or Gem (red).

21 **(e)** Representative images of tissue sections of WT and Meflin-KO mT5 tumors stained for  
22 CD31. Brown color denotes positivity. IHC, immunohistochemistry.

1 **(f)** Schematic illustration depicting the method of quantification of CD31-stained blood  
2 vessel area and lumen of mT5 tumors in WT and Meflin-KO mice, performed using ImageJ  
3 software (left panel). Quantification data are shown in middle and right panels.

4

5 **Figure 2.** SeV-mediated transduction of Meflin induced increases in tumor vessel area and  
6 sensitivity to Gem.

7 **(a, b)** Recombinant SeV encoding DasherGFP (DGFP) or mouse Meflin and DGFP  
8 (mMeflin/DGFP) was used to infect mouse MSCs, followed by western blot (WB) analysis  
9 with the indicated antibodies **(a)** and quantitative PCR (qPCR) for the indicated genes **(b)**.

10 *Mr*, molecular marker.

11 **(c)** WT female mice (P42) were subcutaneously transplanted with mT5 mouse PDAC cells  
12 ( $1 \times 10^6$  cells/mouse), followed by intratumoral injection of the indicated SeV ( $3 \times 10^7$   
13 CIU) at day 12 and sacrifice at day 19.

14 **(d)** Observation of GFP fluorescence in frozen sections prepared from mT5 tumors infected  
15 with SeV encoding DGFP (left) and Meflin/DGFP (right) (upper panel). FFPE sections  
16 were also obtained from tumors and stained for Meflin (*Islr*) and  $\alpha$ -SMA (*Acta2*) by ISH  
17 (middle and lower panels). Arrows indicate *Acta2*<sup>+</sup> CAFs.

18 **(e–h)** mT5 tumors transplanted into WT female mice (P42) were allowed to grow until  
19 reaching 50–100 mm<sup>3</sup> in volume. Mice were then injected with SeV encoding DGFP or  
20 Meflin/DGFP three times every 4 days and sacrificed on day 17 **(e)**. Tumor volume was  
21 measured **(f)**, and IHC for CD31 was performed to quantify the tumor vessel lumen and  
22 CD31<sup>+</sup> area **(g, h)**.

1 **(i, j)** mT5 tumors transplanted into WT female mice (P42) were allowed to grow until  
2 reaching 50–100 mm<sup>3</sup> in volume (day 0). Mice were then injected with SeV encoding  
3 DGFP or Meflin/DGFP three times every 4 days (days 1, 5, and 9). The mice were i.p.  
4 administered Gem four times on days 5, 8, 11, and 14 and then sacrificed on day 17 **(i)**.  
5 Tumor volume was measured **(j)**.

6

7 **Figure 3.** Effects of Am80 administration on the expression of Meflin in CAFs and on  
8 tumor vessel area in a PDAC xenograft mouse model.

9 **(a)** Primary cultured mouse MSCs were plated in the presence of DMSO, ATRA, Am80,  
10 and AM580 for 48 h, and qPCR of the indicated genes was performed.

11 **(b–e)** WT female mice (P42) were subcutaneously transplanted with mT5 mouse PDAC  
12 cells ( $1 \times 10^6$  cells/mouse), followed by oral administration of Am80 (3 mg/kg, 0.5%  
13 carboxymethylcellulose [CMC] solution) every day for 14 days **(b)**. Body weights of mice  
14 **(c)** and tumor volumes **(d)** were measured during the observation period. **(e)** Tumor weight  
15 on the day of sacrifice (day 22).

16 **(f, g)** Tissue sections prepared from control mT5 tumors (left) and those administered  
17 Am80 (right) were examined for Meflin and  $\alpha$ -SMA expression by ISH **(f)** and for CD31  
18 expression by IHC **(g)**. Meflin and  $\alpha$ -SMA expression levels **(f)** and tumor vessel lumen  
19 and CD31<sup>+</sup> areas **(g)** were calculated. For quantification of ISH signals, the number of dots  
20 per high-power (400 $\times$ ) microscopic field (HPF) was counted, and 20 HPFs randomly  
21 selected from 5 animals were evaluated for each group. Asterisks denote tumor cells that  
22 were negative for Meflin and  $\alpha$ -SMA expression.



1

2 **Figure 4.** Am80 administration improved tumor sensitivity to Gem and induced Meflin  
3 expression in CAFs in a PDAC xenograft mouse model.

4 **(a)** WT female mice (P42) were subcutaneously transplanted with mT5 mouse PDAC cells  
5 ( $1 \times 10^6$  cells/mouse) on day 0, followed by oral administration of Am80 from day 8 for 16  
6 consecutive days. The mice were administered Gem from day 15 three times every 3 days  
7 and sacrificed on day 24.

8 **(b–d)** Measurement of the body weights of mice **(b)** and tumor volumes **(c)** during the  
9 observed period and of tumor weights on day 24 **(d)**.

10 **(e)** Representative images of H&E-stained tissue sections of tumors prepared from the  
11 indicated groups. Boxed regions are magnified in insets. Arrows denote necrotic cells with  
12 pyknotic nuclei. The numbers of necrotic cells were counted and quantified in the graph  
13 shown in the right panel. Twenty-five images obtained from five tumors per group using a  
14 20× objective lens were analyzed and quantified.

15 **(f, g)** Tissue sections of tumors from the indicated groups were stained for Meflin and  $\alpha$ -  
16 SMA by ISH **(f)**, followed by quantification of total dot numbers **(g)**. Open and solid  
17 arrowheads denote Meflin<sup>+</sup> and  $\alpha$ -SMA<sup>+</sup> CAFs, respectively.

18 **(h)** Quantification of dFdc (Gem) delivered to tumors in the indicated groups after  
19 administration of Gem three times. Lysates prepared from mT5 tumors treated with Gem (n  
20 = 17) and Gem plus Am80 (n =17) were added with stable isotope-labeled dFdc (internal  
21 control) subjected to liquid chromatography-mass spectrometry analysis, followed by

1 quantification of dFdC and the internal control. The data are expressed as relative ratios of  
2 dFdC to the internal control.

3

4 **Figure 5.** Increased tumor chemosensitivity by Am80 administration was mediated by  
5 alterations in Meflin expression in CAFs.

6 **(a)** Meflin-KO female mice (P42) were subcutaneously transplanted with mT5 mouse  
7 PDAC cells ( $1 \times 10^6$  cells/mouse) on day 0, followed by oral administration of Am80 from  
8 day 8 for 16 consecutive days. Mice were administered Gem from day 15 three times every  
9 3 days and sacrificed on day 24.

10 **(b–d)** Measurement of the body weights of mice **(b)** and tumor volumes **(c)** during the  
11 observation period, and tumor weights on day 24 **(d)**.

12 **(e)** Representative images of H&E-stained tissue sections of tumors prepared from the  
13 indicated groups. Boxed regions are magnified in insets. Arrows denote necrotic cells with  
14 pyknotic nuclei. The numbers of necrotic cells were counted and quantified in the graph  
15 shown in the right panel.

16 **(f, g)** Tissue sections of tumors from the indicated groups were stained for  $\alpha$ -SMA by ISH  
17 **(f)**, followed by quantification of the total dot numbers **(g)**.

18 **(h–j)** Adult nude female mice (P42) were subcutaneously implanted with either human  
19 BxPC3 PDAC cells alone ( $1 \times 10^6$  cells/mouse) or both BxPC3 cells and immortalized  
20 human PSC cells at a 1:5 ratio (BxPC3:  $1 \times 10^6$  cells, PSC:  $5 \times 10^6$  cells), followed by oral  
21 administration of either DMSO or Am80 from day 3 for 12 consecutive days **(h)**. Mice

1 were administered Gem from day 6 three times every 3 days, followed by sacrifice on day  
2 15 and measurement of tumor volumes (**i, j**).

3

4 **Figure 6.** Meflin was involved in the regulation of Lox activity and collagen remodeling.

5 **(a)** The indicated plasmids were transfected into HEK293 cells, followed by IP with anti-  
6 HA antibodies and WB analysis. Lox coprecipitated with HA-Meflin (asterisk). mMeflin,  
7 mouse Meflin; mLox, mouse Lox; SS, signal sequence; TCL, total cell lysate.

8 **(b)** Interaction of endogenous Meflin and Lox proteins. Cell lysates prepared from the  
9 fHDF/TERT166 fibroblast cell line (left) or primary cultured human fibroblasts (NHDFs,  
10 right) were immunoprecipitated with anti-Meflin antibodies, followed by analysis of eluates  
11 by WB with the indicated antibodies. Lox proteins coprecipitated with Meflin (asterisk).

12 **(c)** Primary structure of human Meflin (top) and mouse Lox (middle). Lox comprises an  
13 amino-terminal SS, a pro-sequence, and a catalytic domain (CD). (Bottom) Construct  
14 encoding the CD of Lox with an SS at the amino terminus. Dashed line: protein domains  
15 responsible for the Lox/Meflin interaction.

16 **(d)** The indicated plasmids were cotransfected into 293FT cells, followed by IP with anti-  
17 HA antibodies and WB analysis. Meflin interacted with the CD of mLox (asterisk).

18 **(e)** Conditioned medium from control Flp-In-293 cells or Flp-In-293 cells stably expressing  
19 mMeflin was mixed with recombinant Lox12 (0.25 and 0.5  $\mu\text{g/mL}$ ), followed by  
20 measurement of hydrogen peroxide using a fluorometric-based method. (Left) WB analysis  
21 of Meflin expression in Flp-In-293 cells. RFU, relative fluorescence unit.

1   **(f, g)** Measurement of collagen alignment in the stroma of mT5 tumors developed in mice  
2   by SHG microscopy. Eight to sixteen images from tissue sections of control tumors and  
3   tumors treated with Am80 were analyzed. Representative images **(f)** and quantification of  
4   collagen alignment **(g)**.

5   **(h, i)** Measurement of the stiffness of mT5 tumors developed in control mice (n = 14) and  
6   those treated with Am80 (n = 16). The Young's modulus of the flat surfaces of tumors  
7   contacting the fascia of the panniculus carnosus muscle were measured **(h)**. One or two  
8   points were selected in each tumor, and each point was measured more than 5 times;  
9   quantification was performed **(i)**.

10   **(j)** Schematic diagram showing the working hypothesis for the mechanism of Am80-  
11   mediated alteration in tumor sensitivity to chemotherapeutics.

**a****Meflin high:** Meflin<sup>+</sup> CAFs ≥ 30% of all stromal cells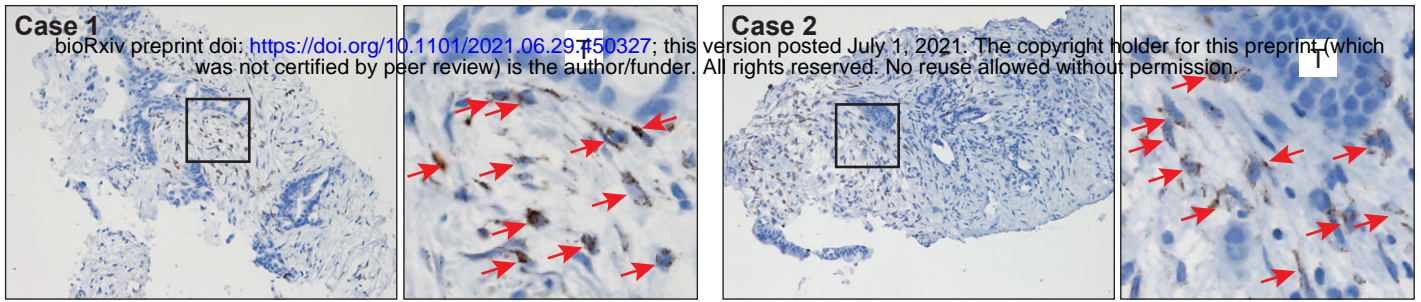**Meflin low:** Meflin<sup>+</sup> CAFs < 30% of all stromal cells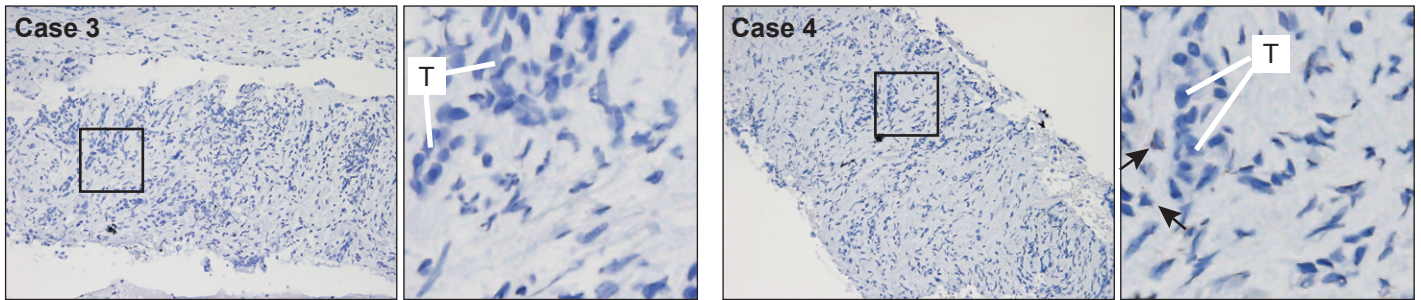**b**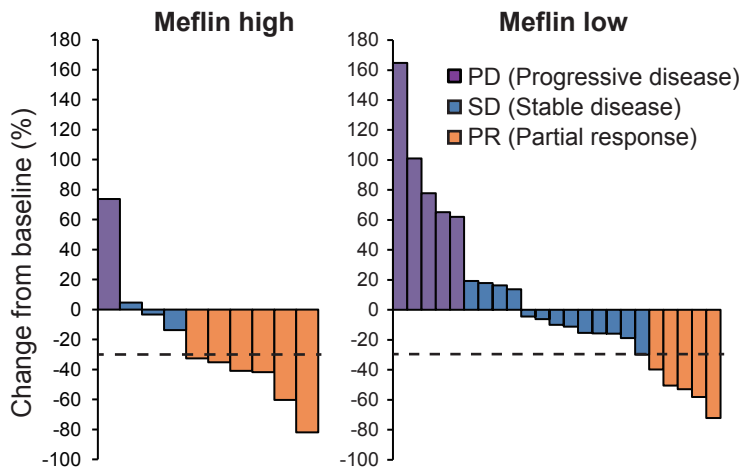

|                  | Meflin high      | Meflin low     |
|------------------|------------------|----------------|
| No. of patients  | 10               | 23             |
| PR               | 6                | 5              |
| SD               | 3                | 13             |
| PD               | 1                | 5              |
| ORR (%) (95% CI) | 60 (97 to 23)    | 22 (0 to 58.6) |
| Odds ratio       | 5.4 (1.08-26.93) |                |
| <i>P</i> value   | 0.0494           |                |

**c**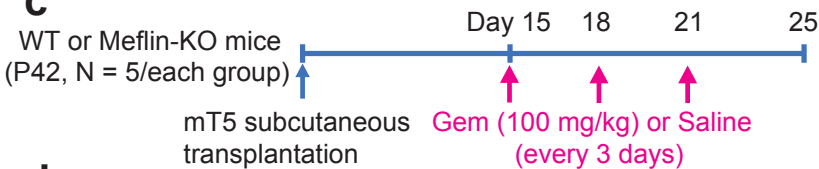**d**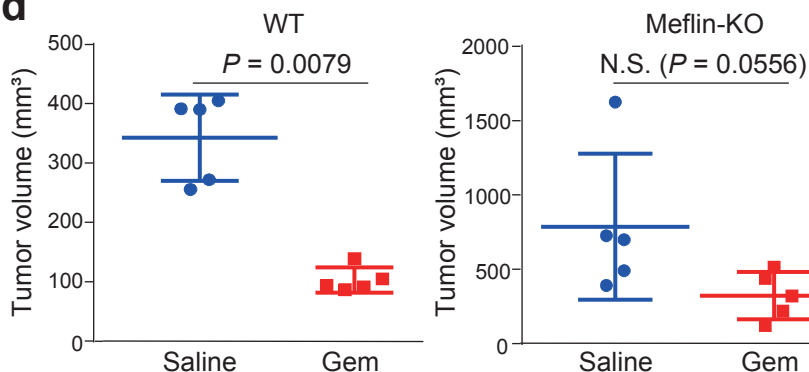**e**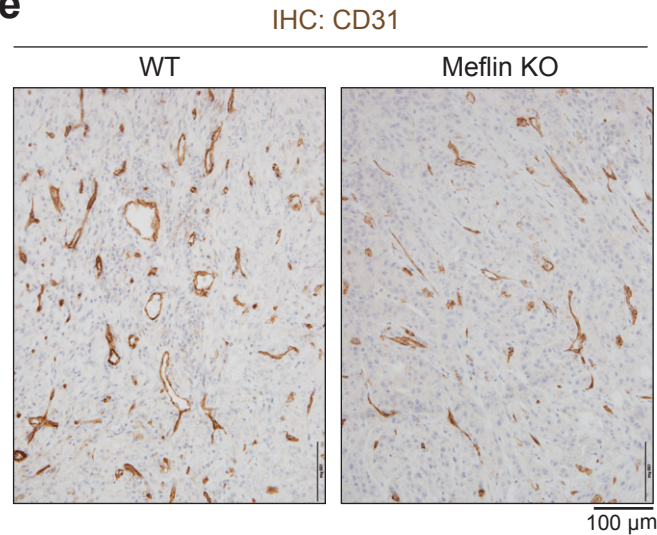**f**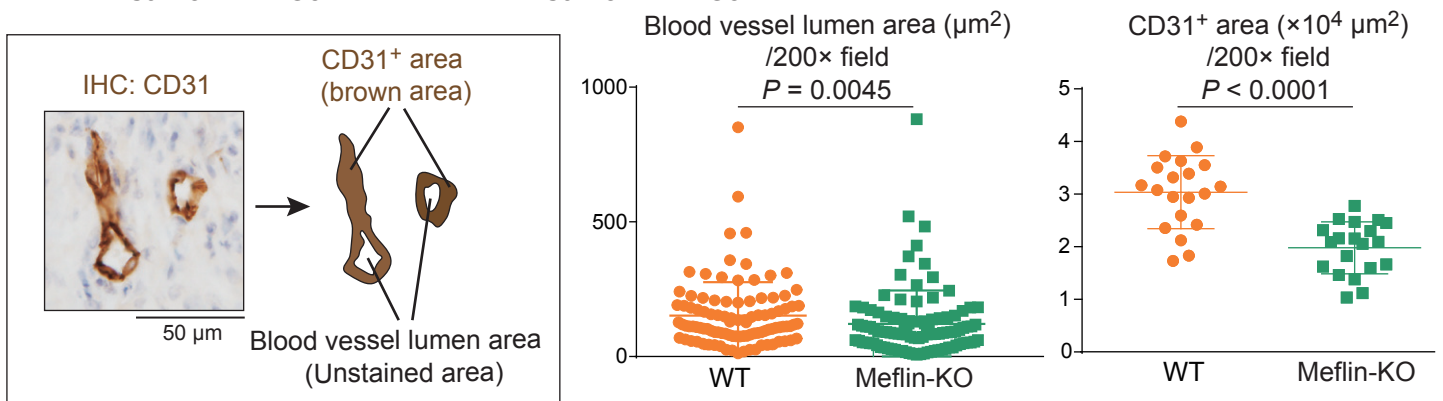

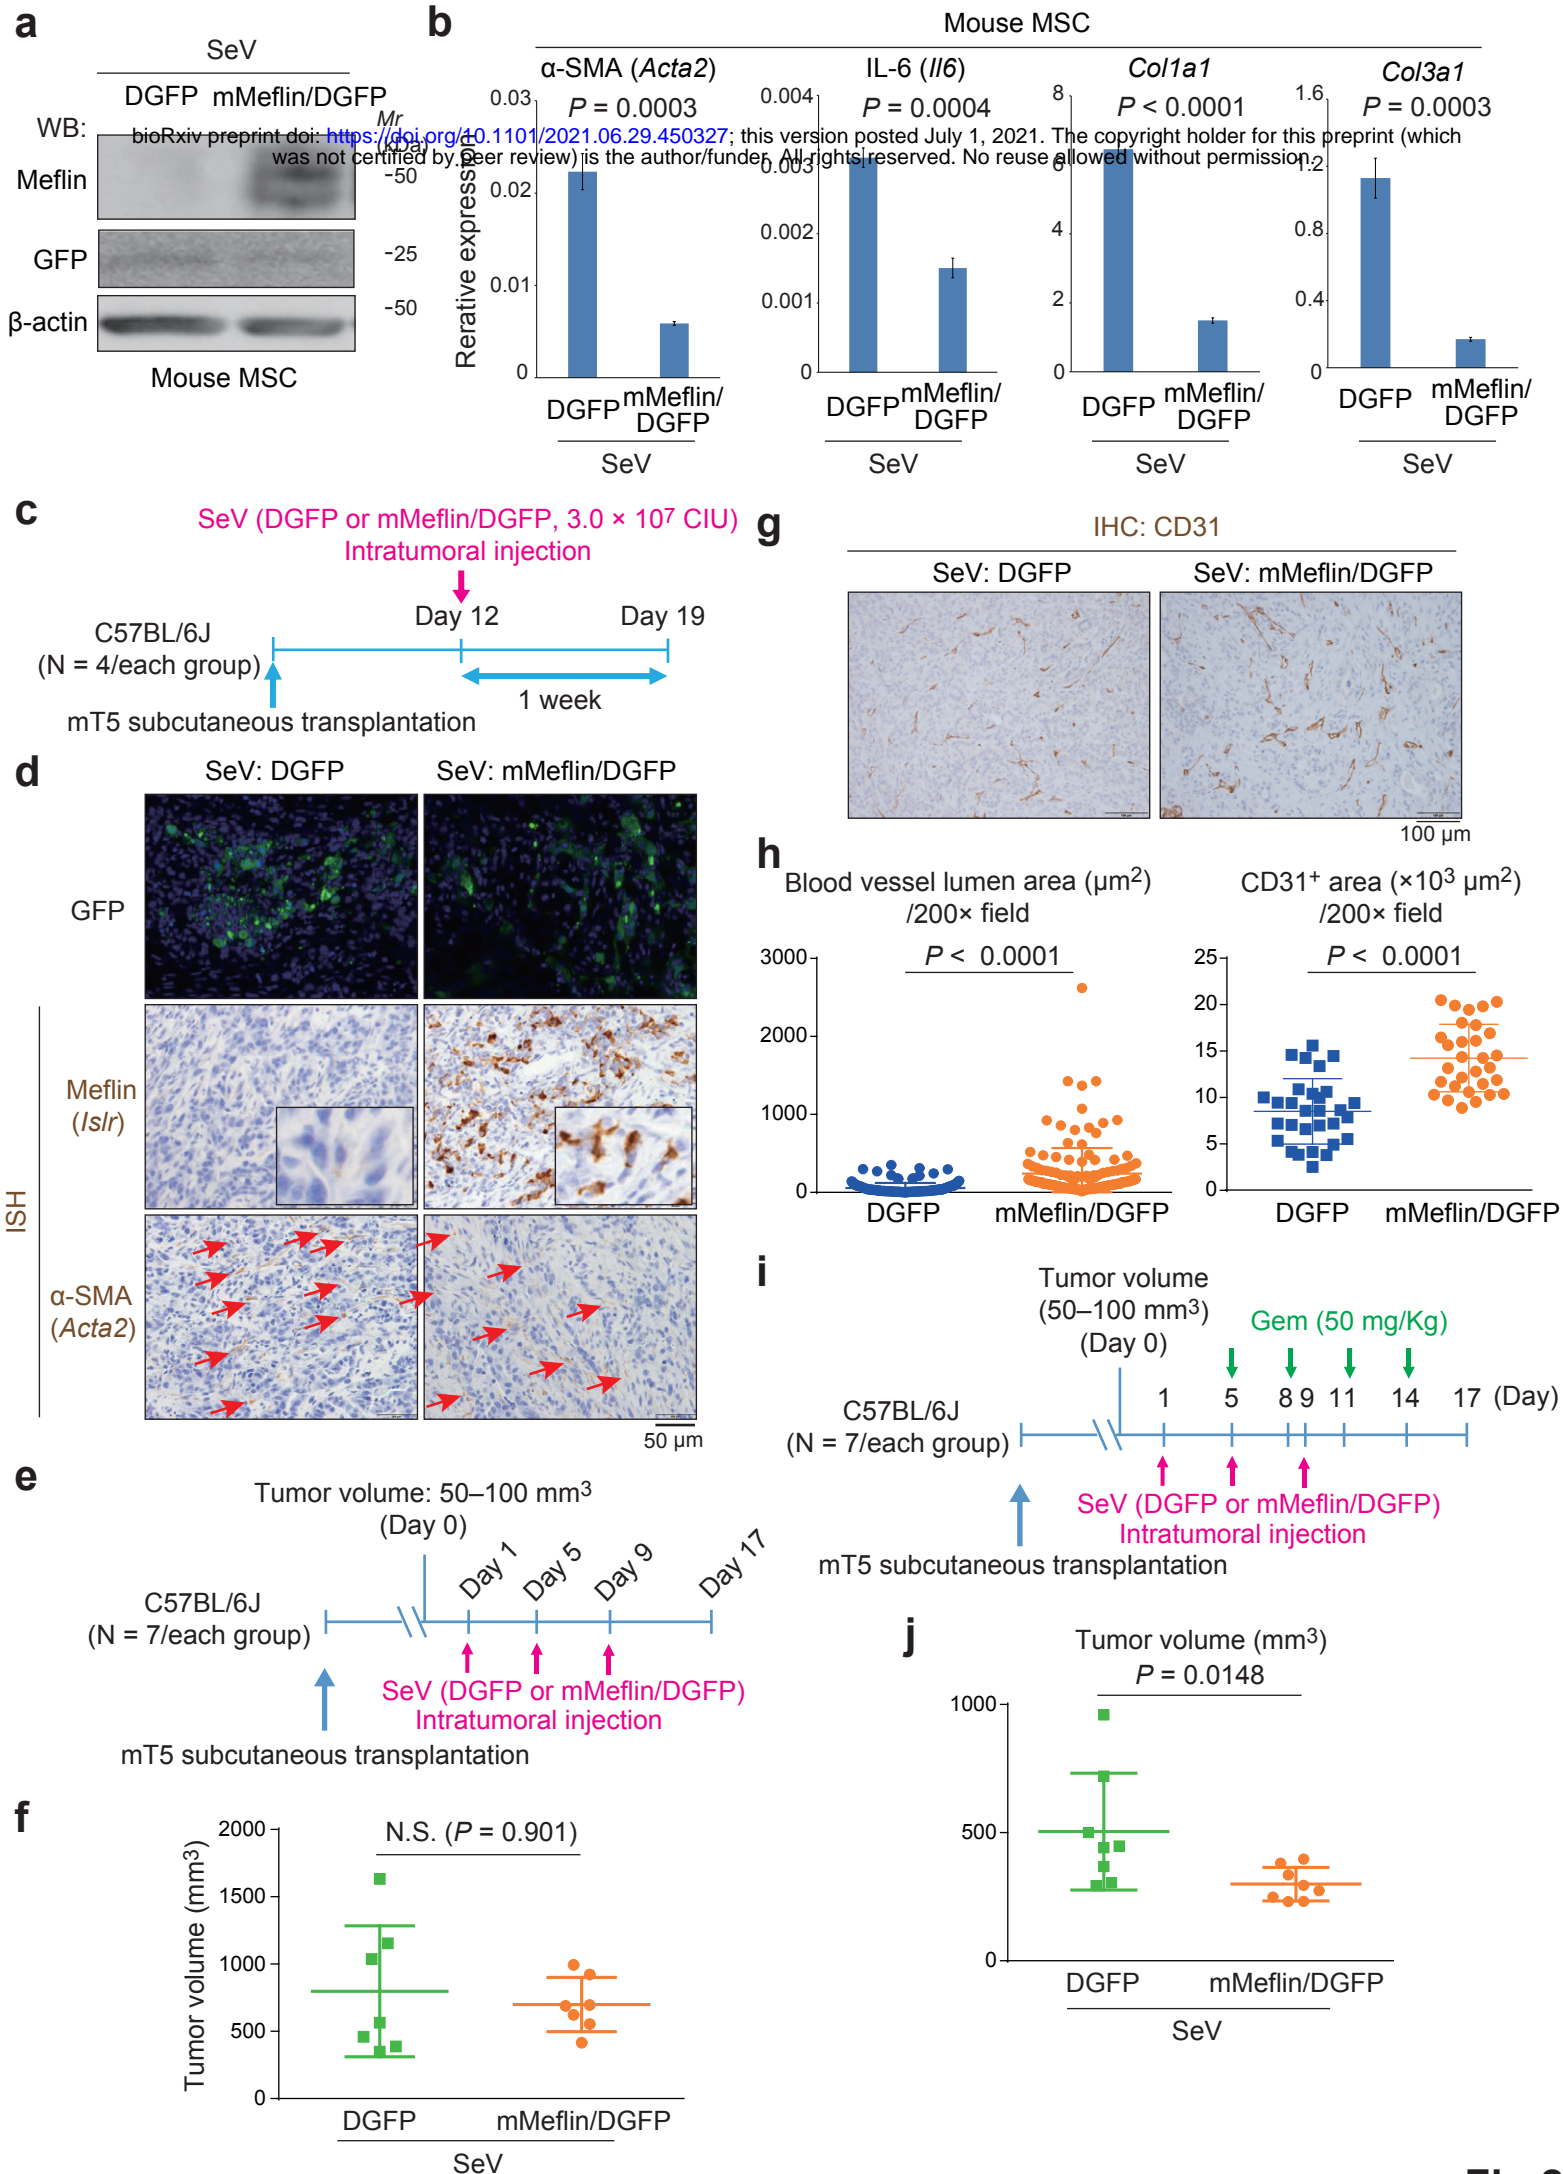

**Fig 2**

**a** Primary cultured mouse MSC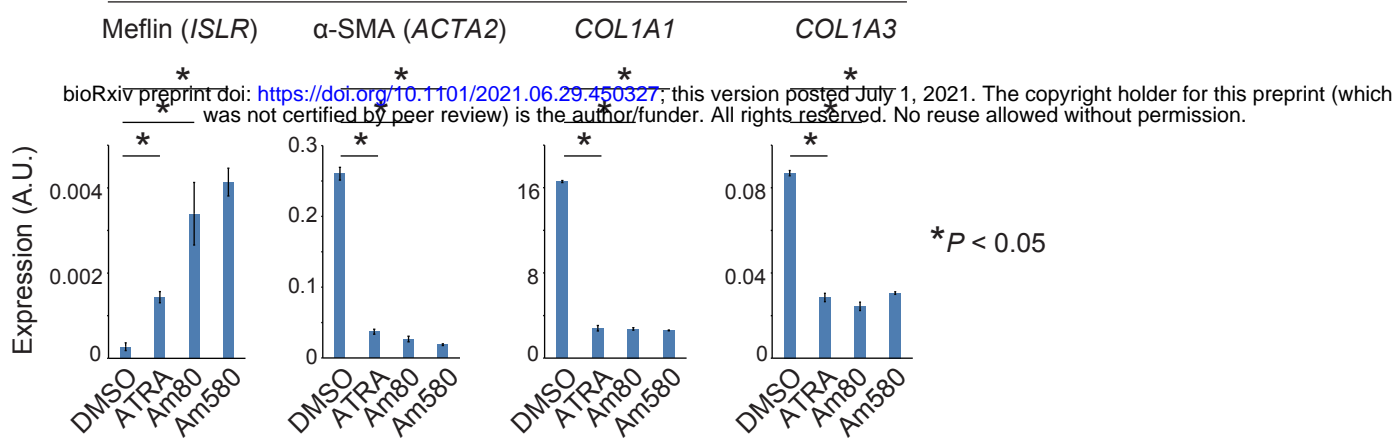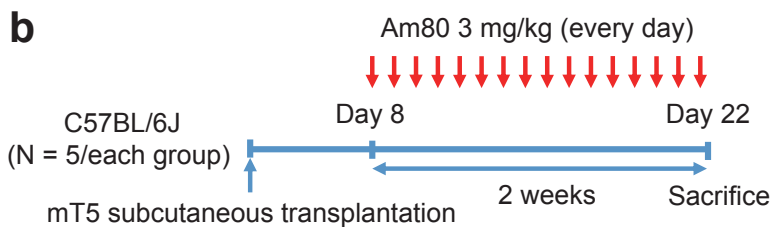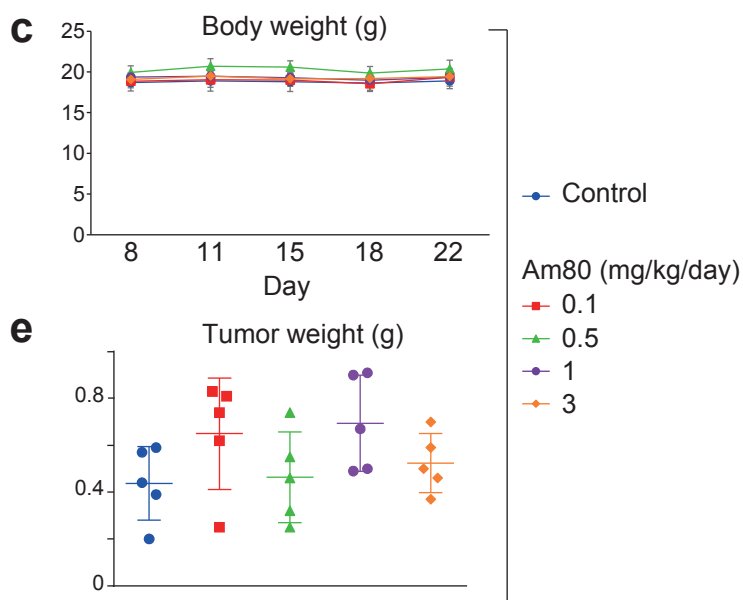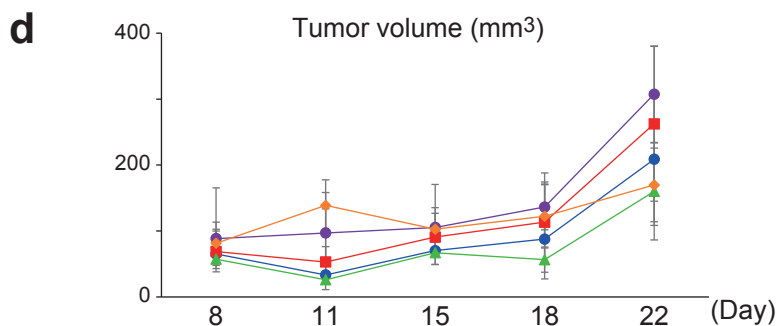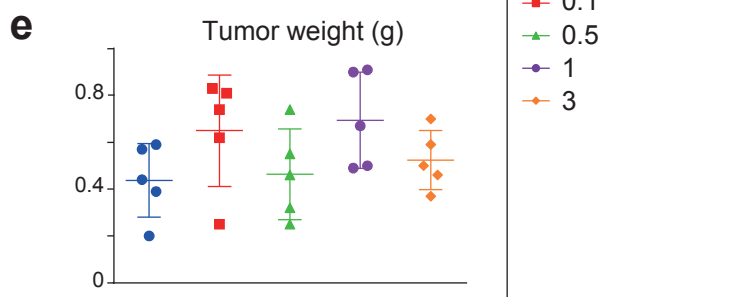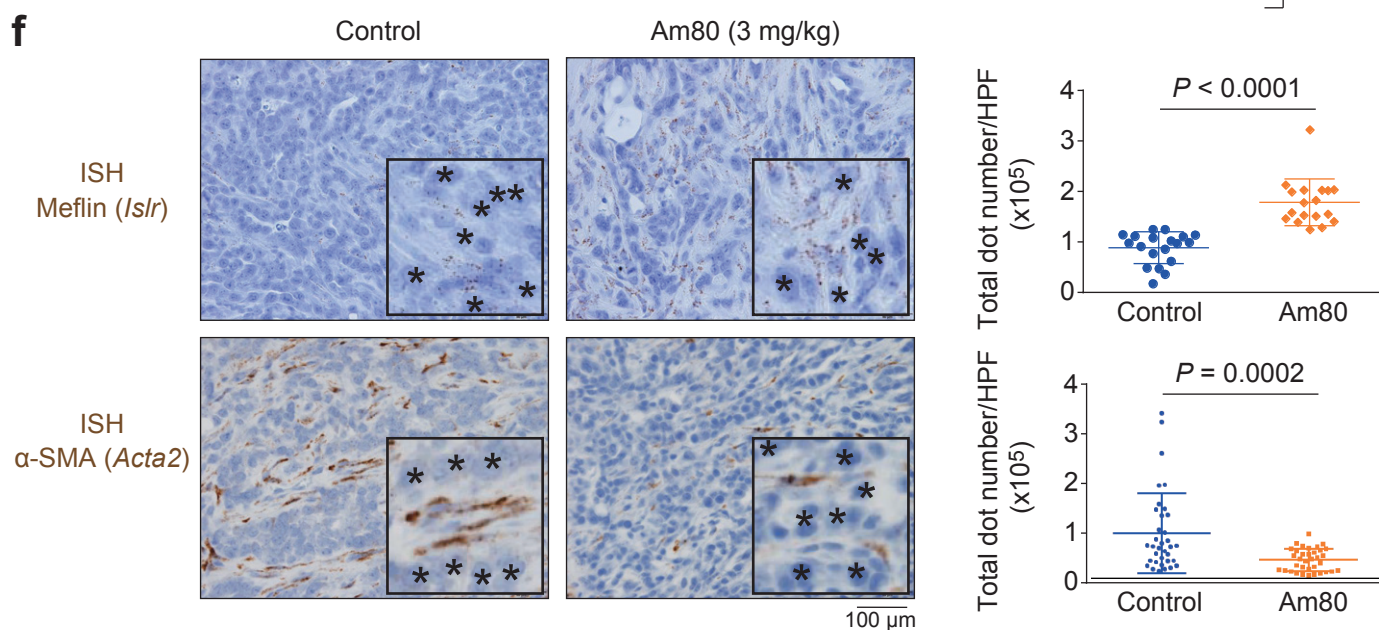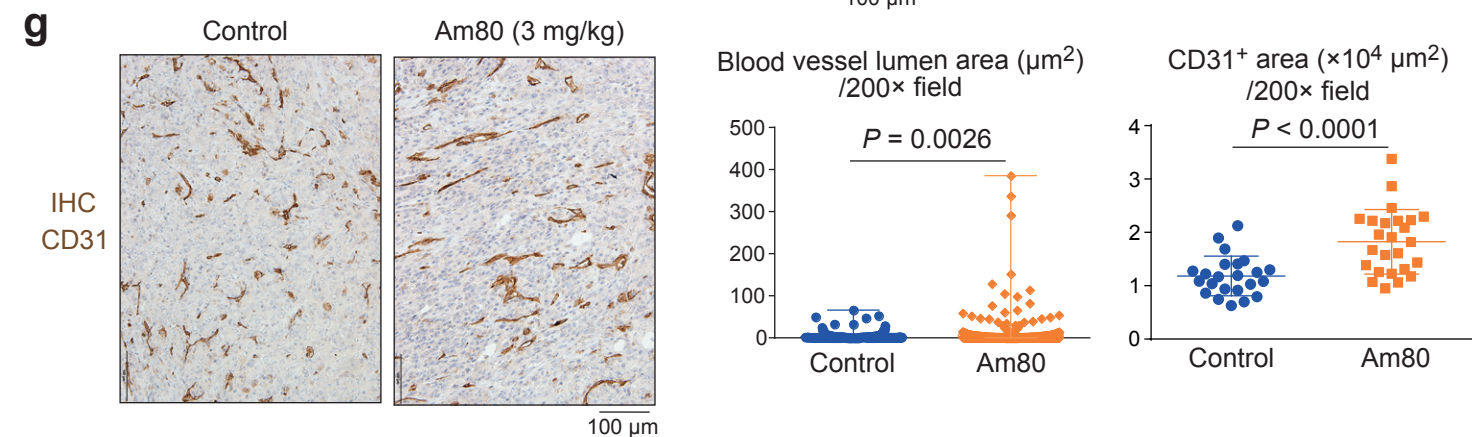**Fig 3**

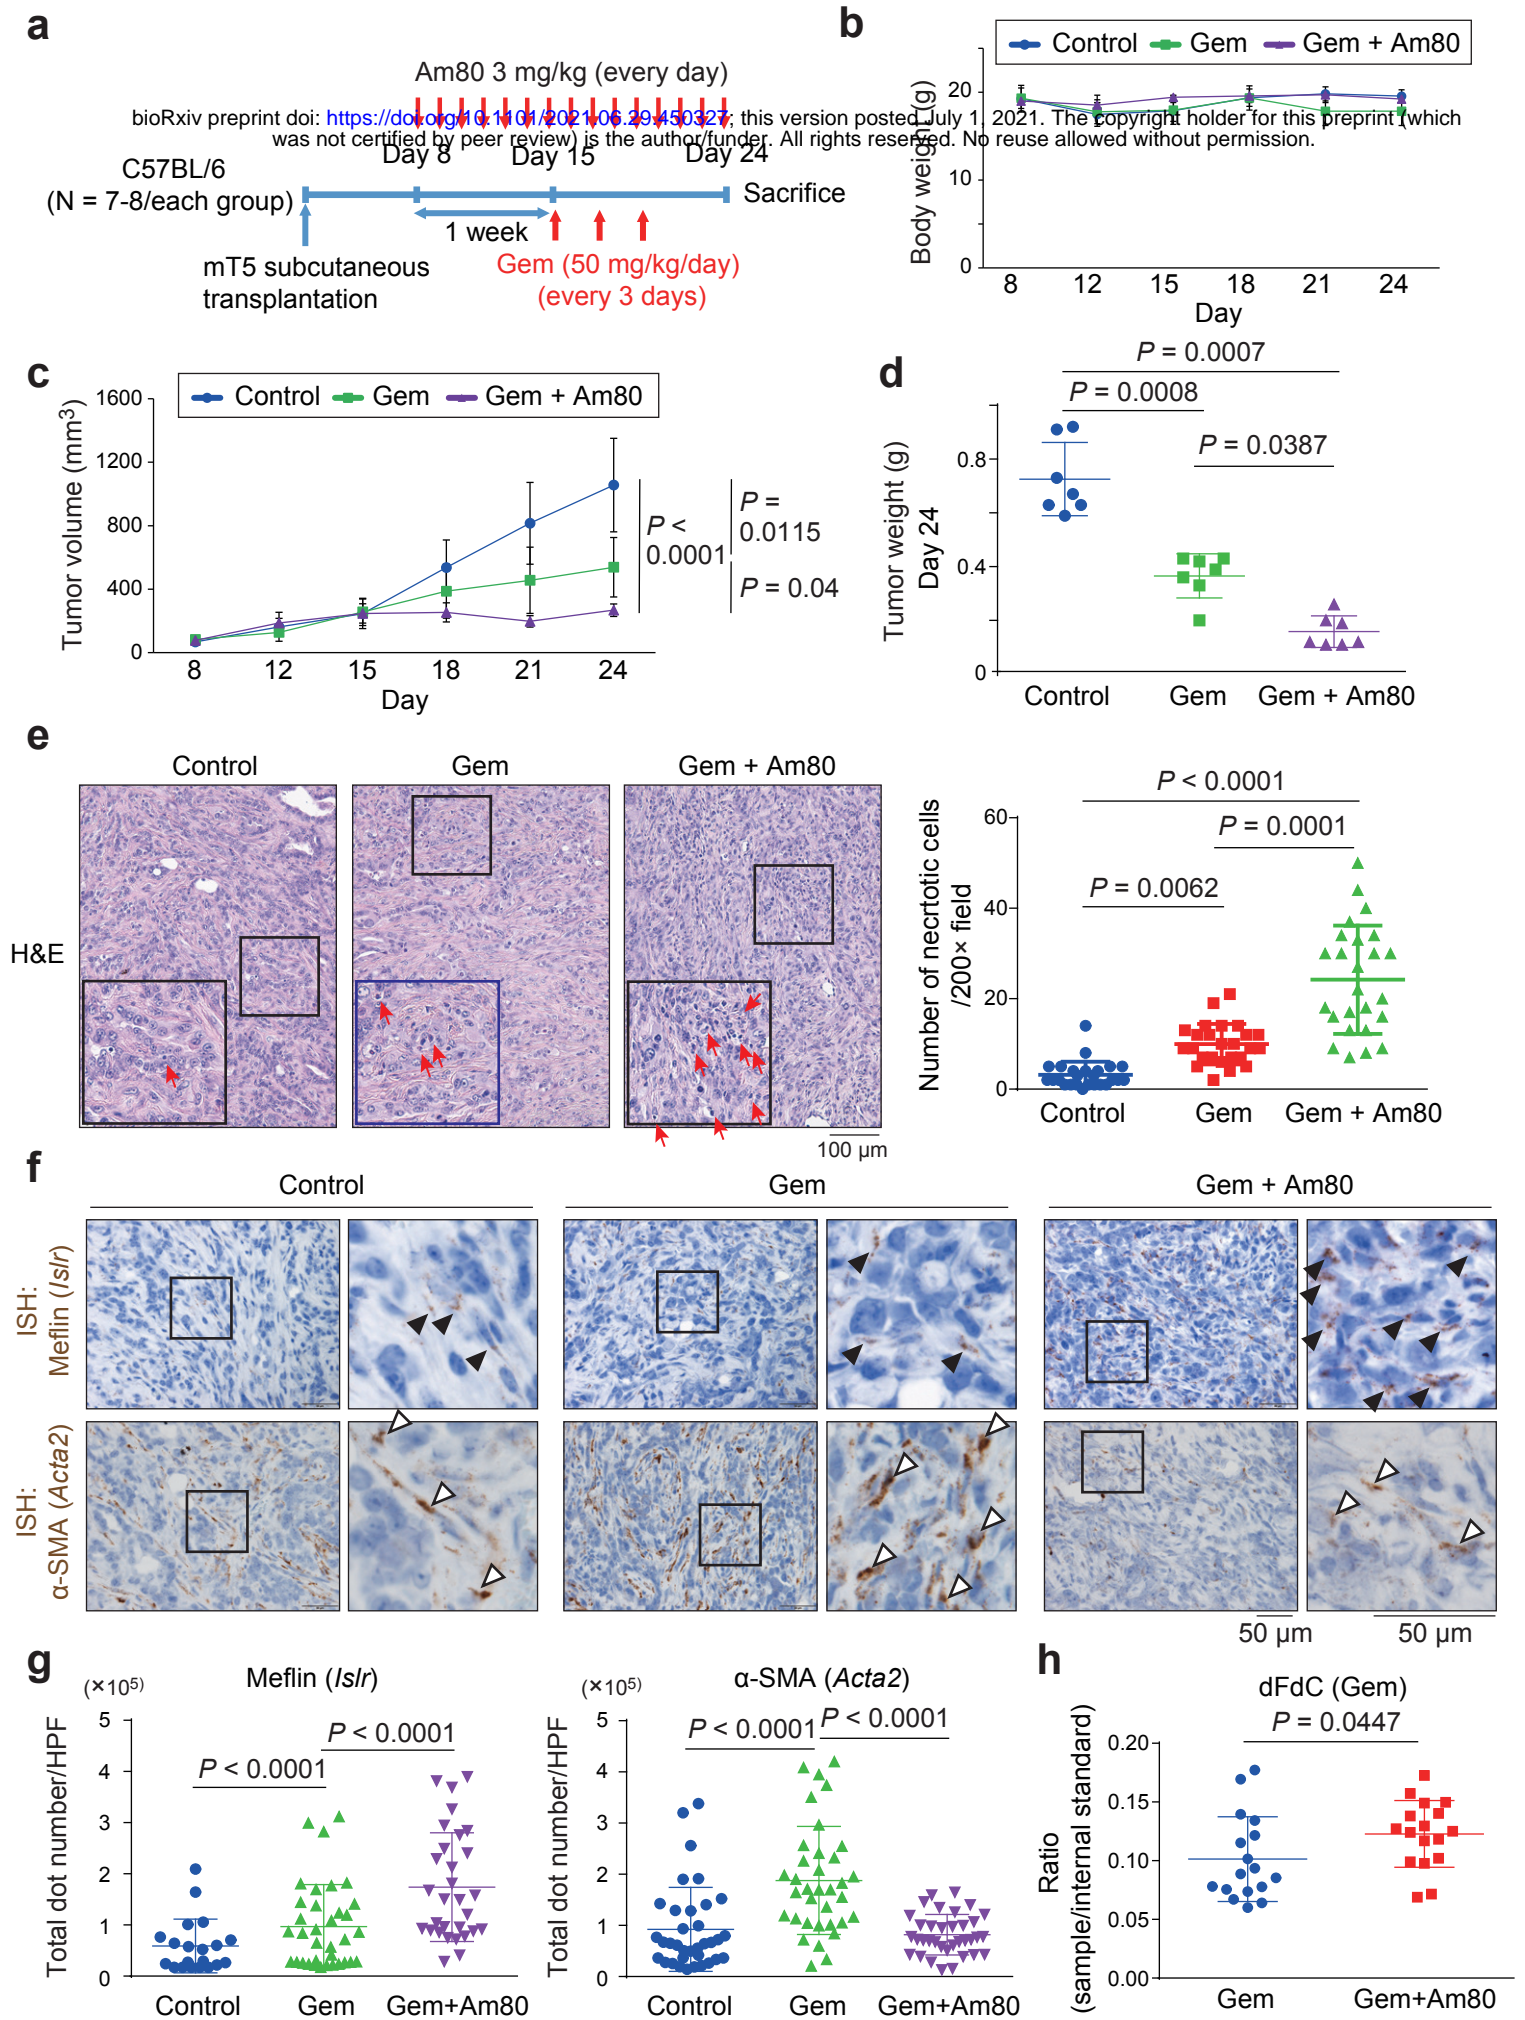

**Fig 4**



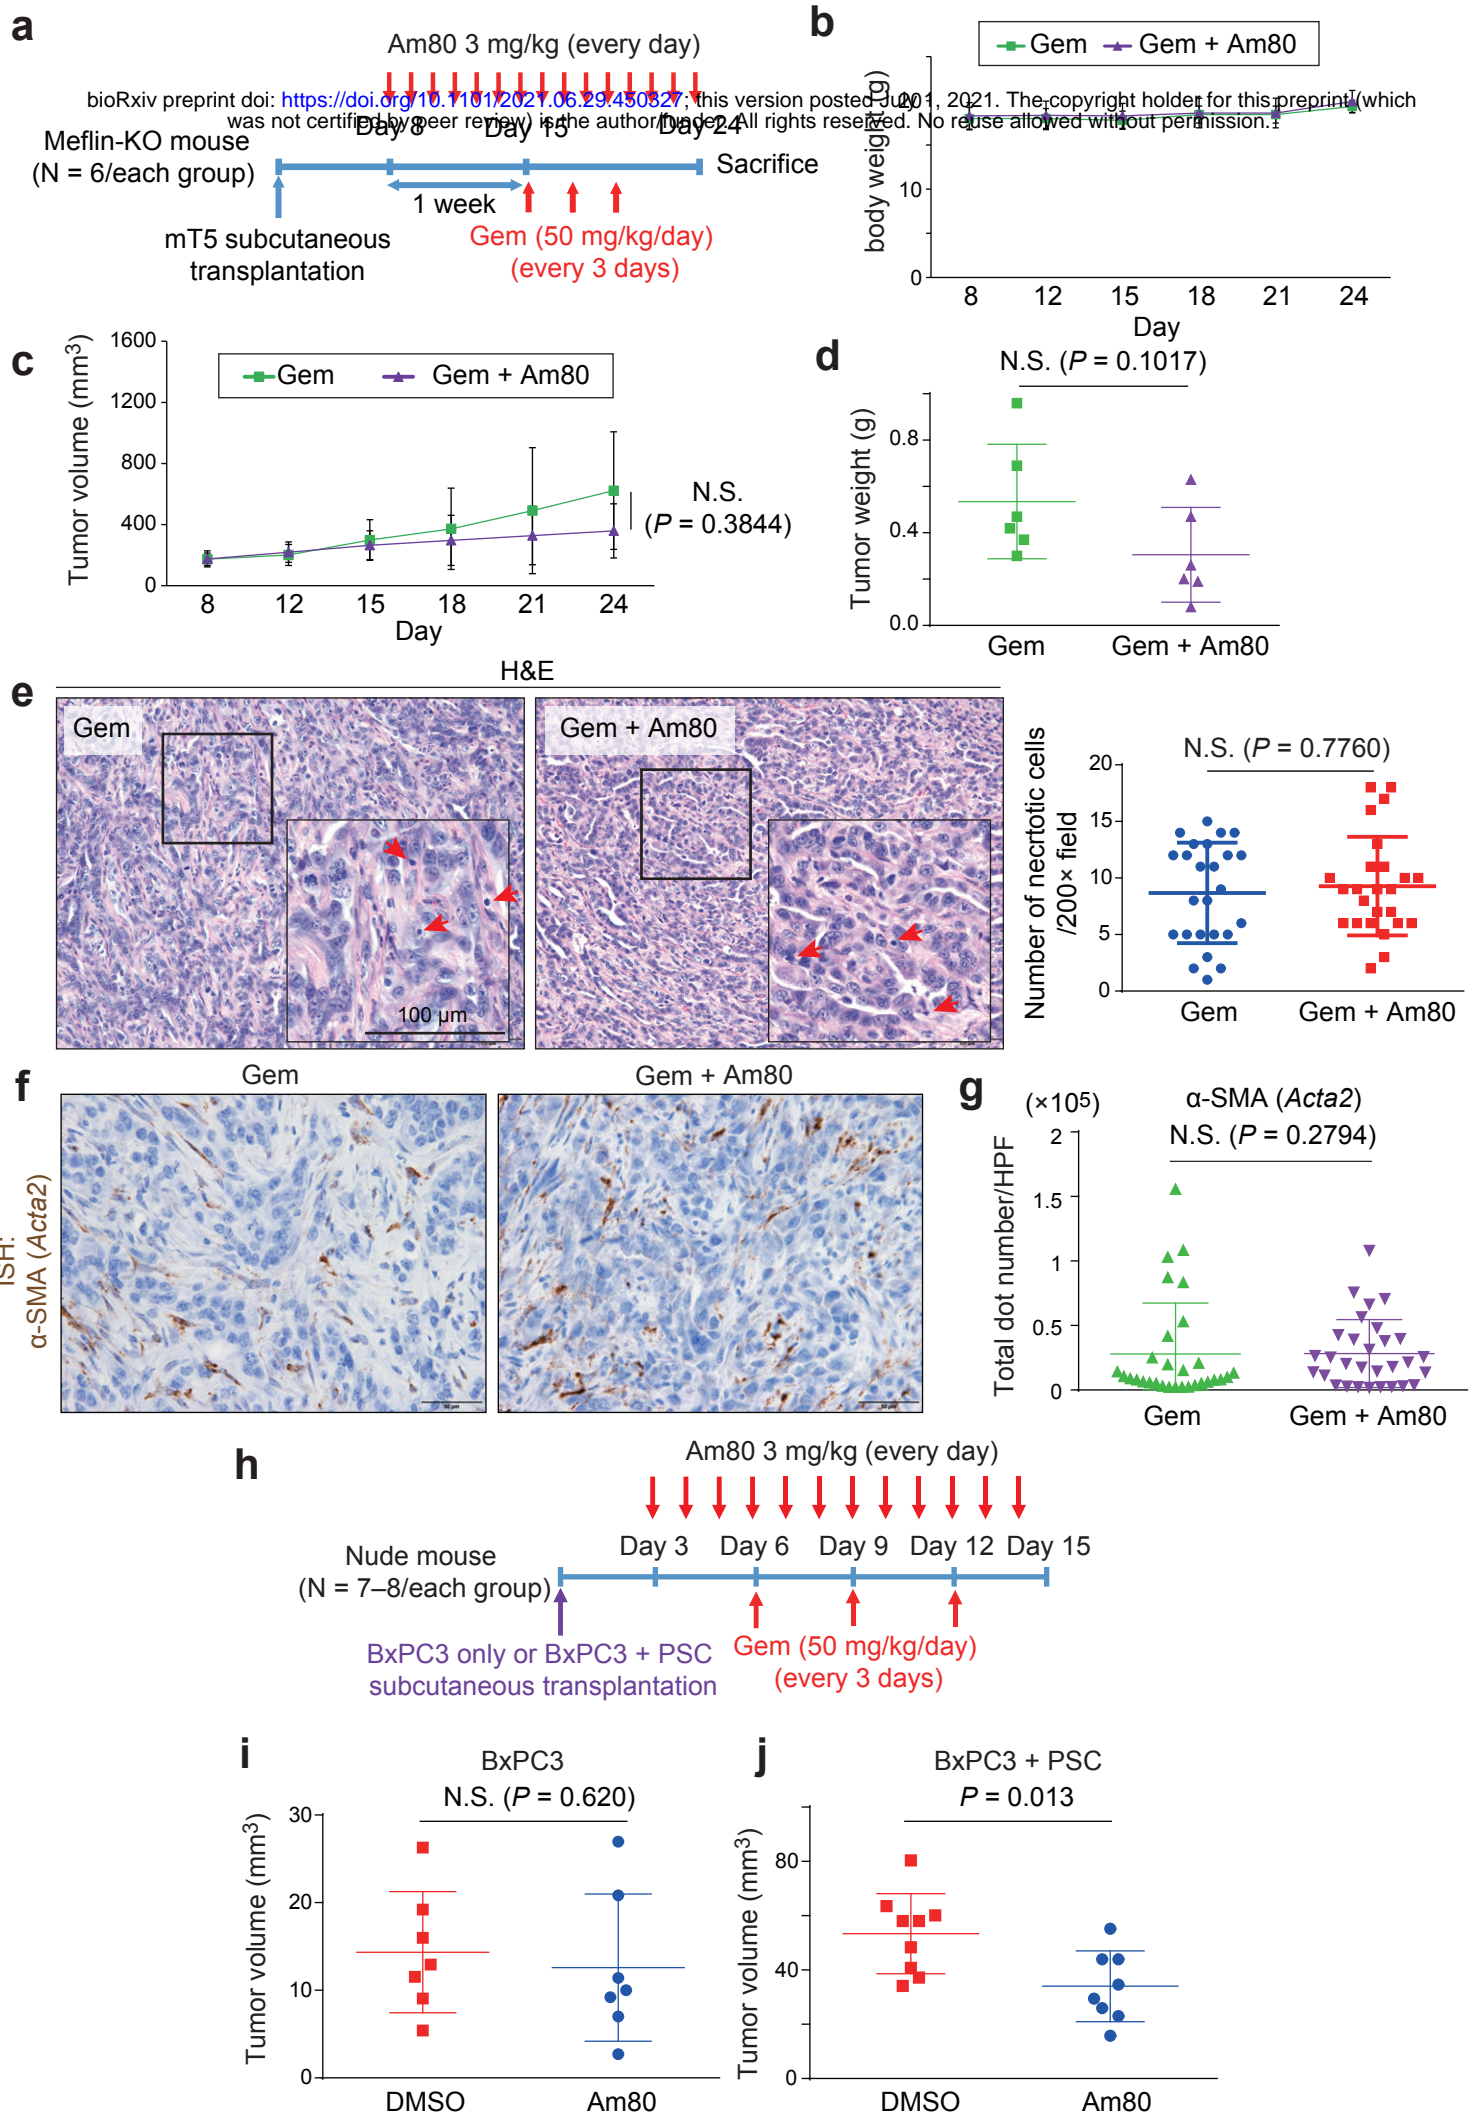

**Fig 5**

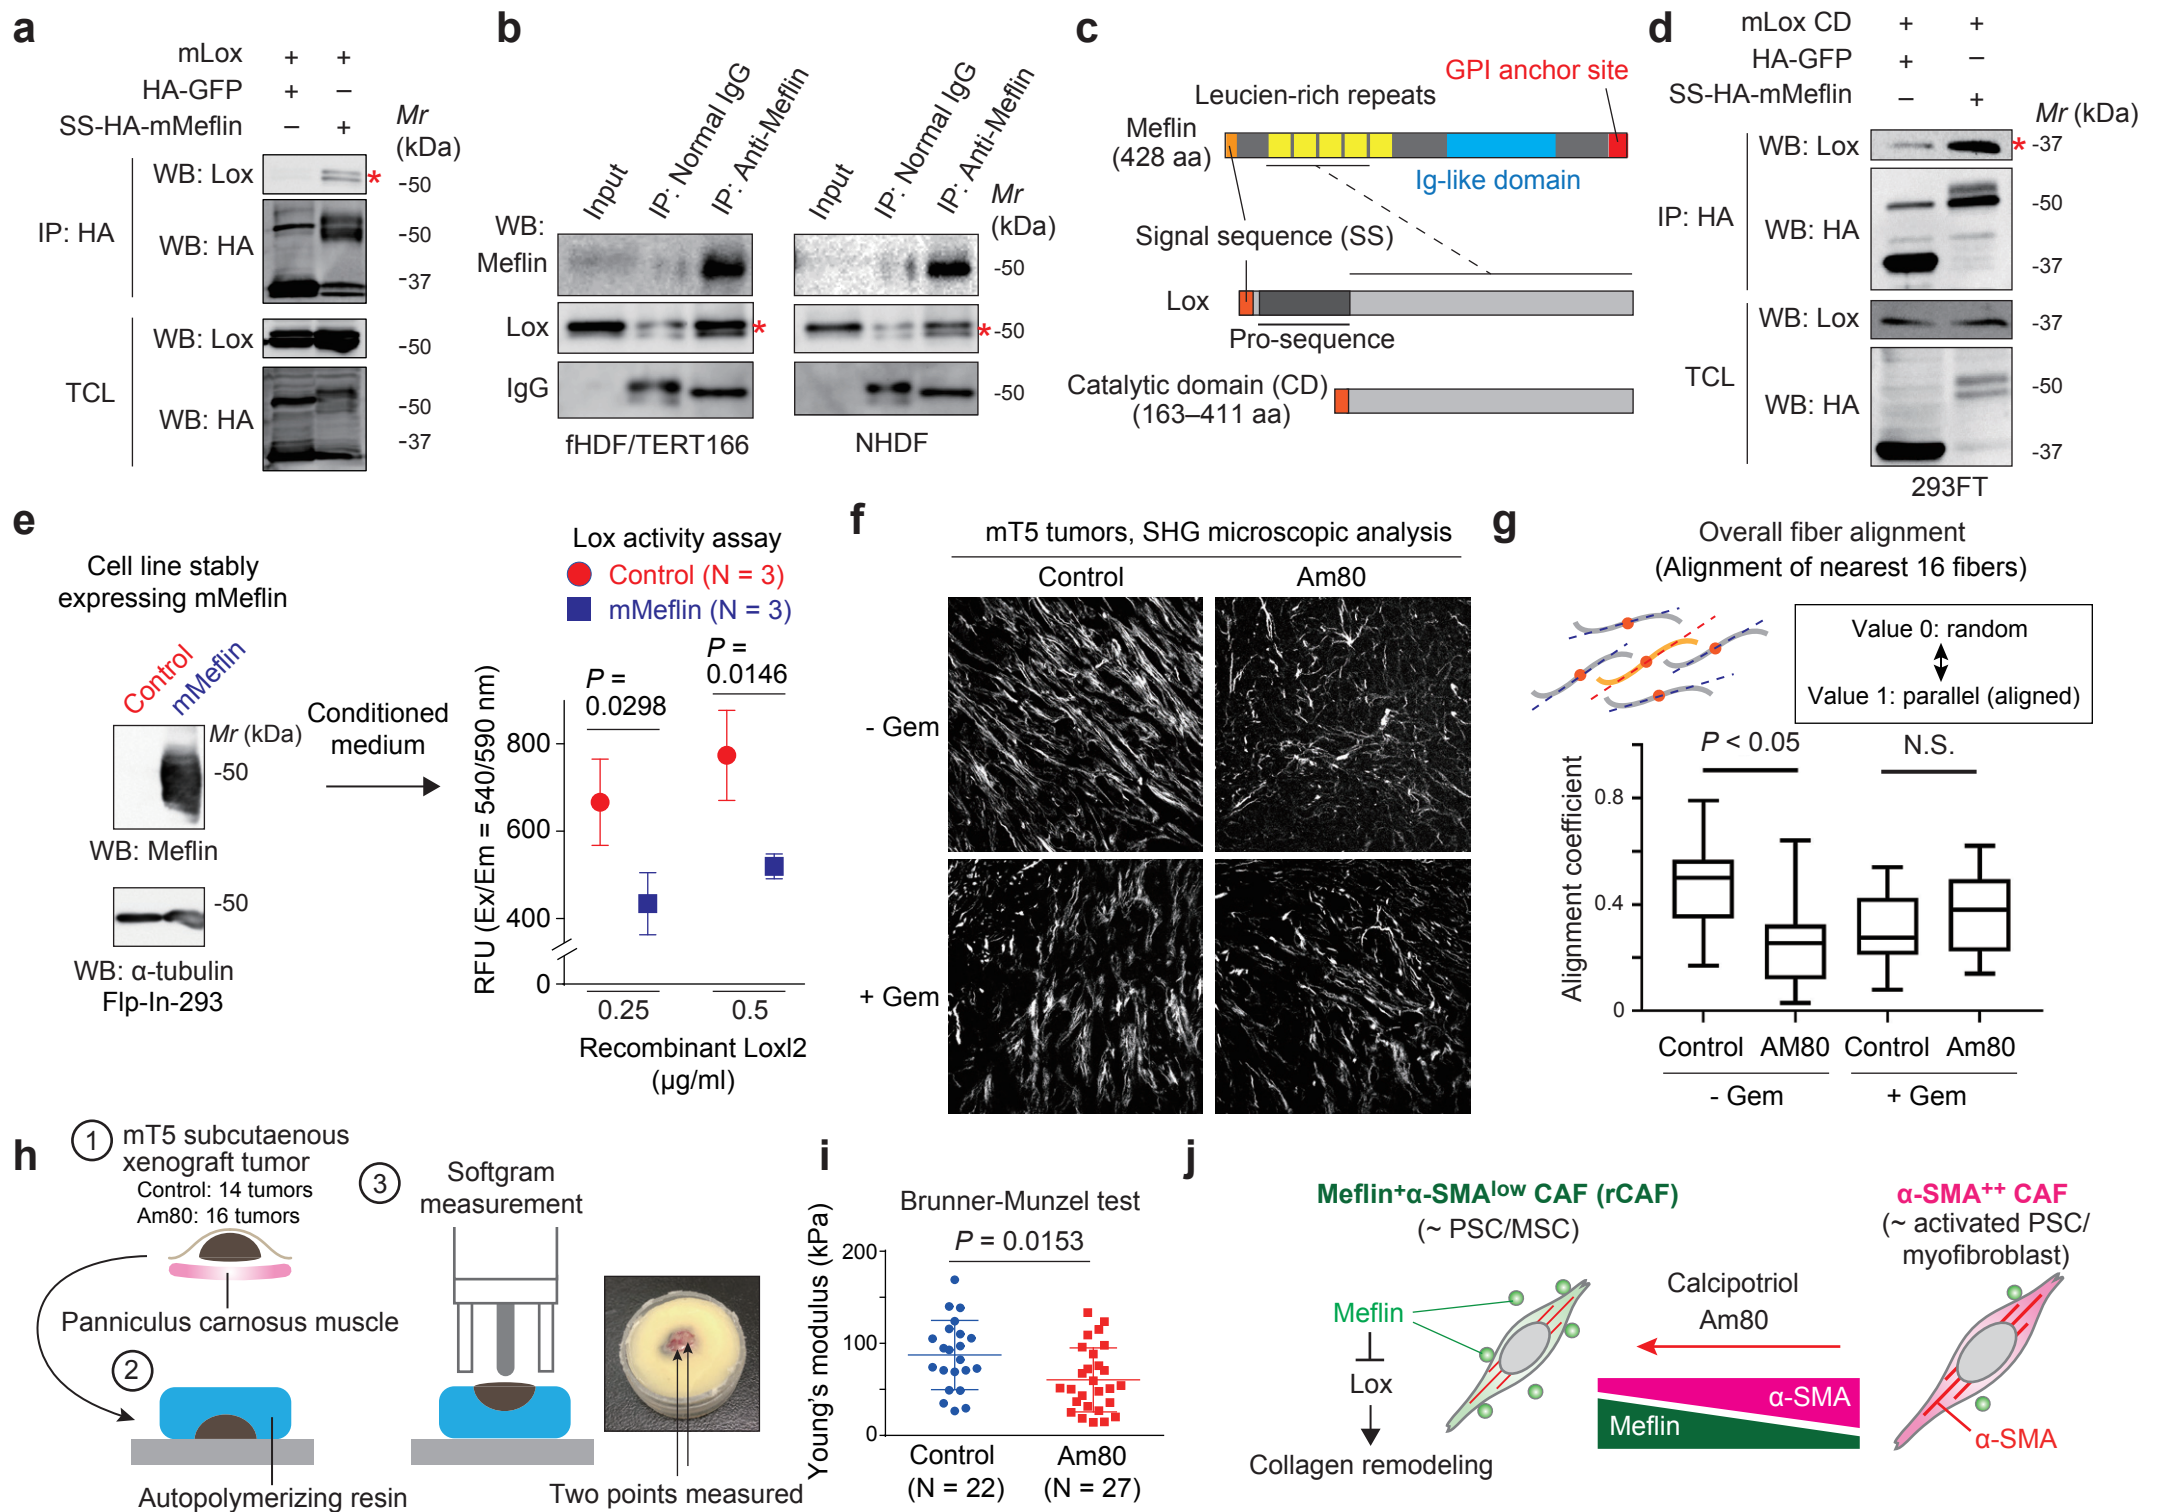

**Fig 6**
